# Supplementary material for: Deficient autophagy in epithelial stem cells drives aging in the freshwater cnidarian Hydra
Source: PubMed Central journal article supplement (PMC6983715; doi:10.1242/dev.177840), 2020-01-23
Supplement: develop-147-177840-s1.pdf [file develop-147-177840-s1.pdf]

## SUPPLEMENTARY FIGURES

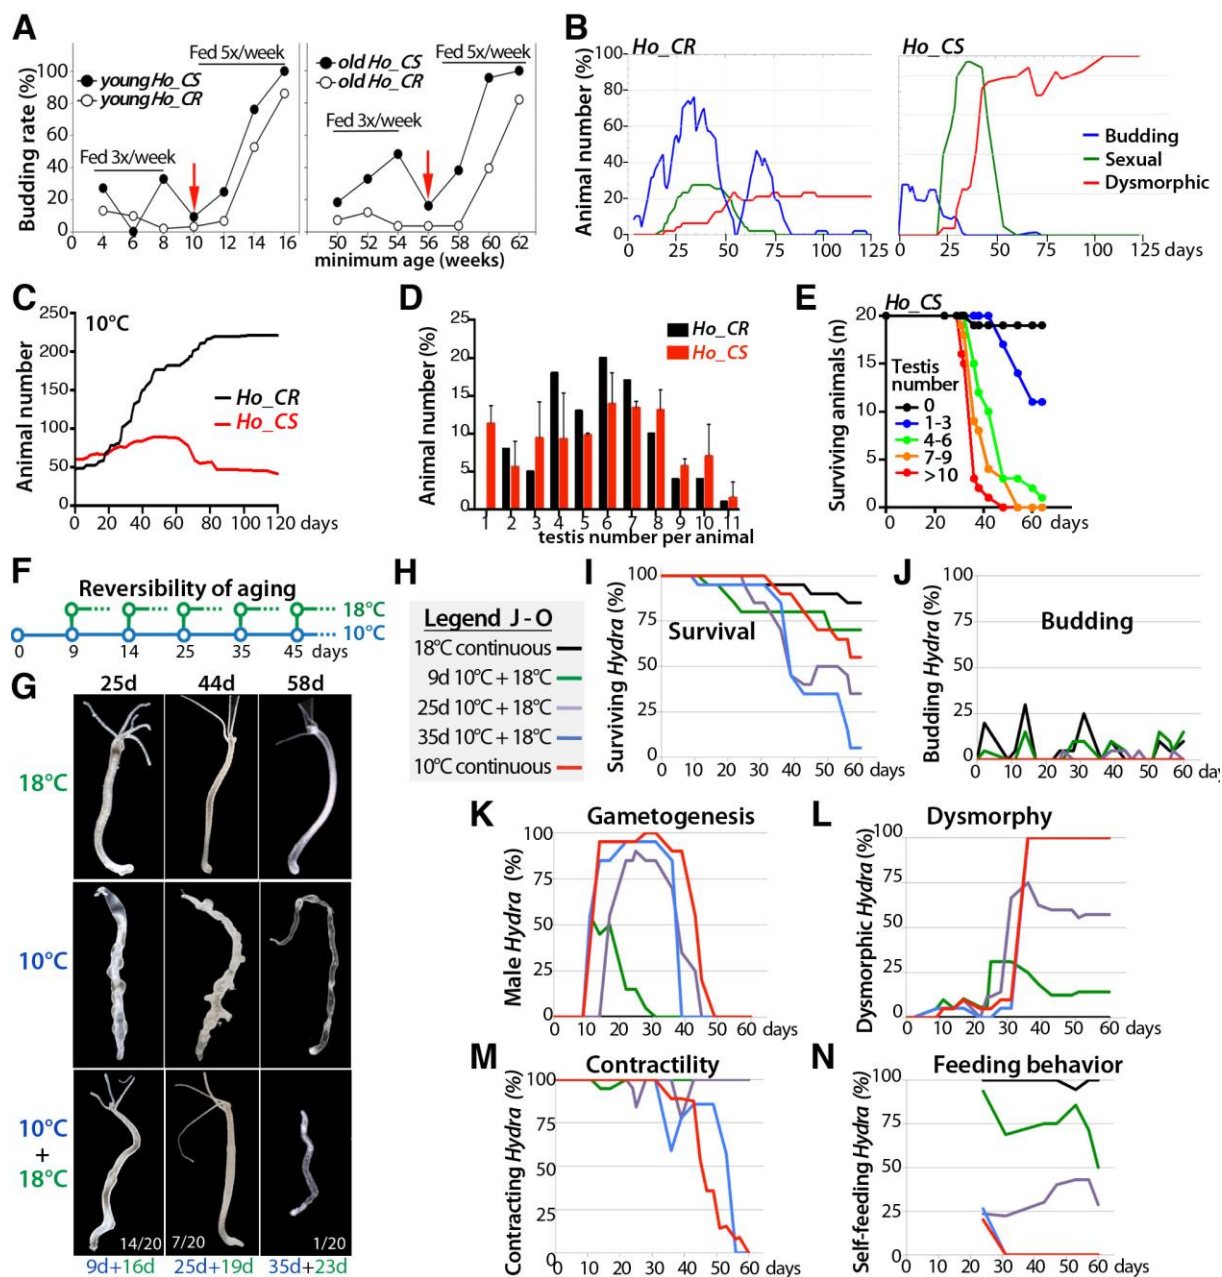Figure S1: Features and reversibility of the cold-induced aging phenotype in *Ho\_CS* animals

**(A)** Budding rate of juvenile (4 to 16 weeks old, left graph) and older (50 to 62 weeks old, right graph) *Ho\_CS* and *Ho\_CR* animals kept at 18°C and submitted to two successive feeding regimes. Red arrows indicate the transition from 3x to 5x feedings a week. In both cohorts the budding rate is up-regulated by a heavy diet, however older *Ho\_CS* animals appear more prone to bud than *Ho\_CR*. **(B,C)** Comparative analysis of two cohorts of *Ho\_CR* (n=48) and *Ho\_CS* (n=60) animals transferred to 10°C on day-0, showing in **(B)** the rates of budding (blue), sexual differentiation (green) and dysmorphic traits (red), and in **(C)** the population size kinetics. Buds produced at 10°C do not undergo aging. In the experiment depicted in **(C)**, buds were not removed from the culture and thus included in the population size. The recorded dysmorphic features were duplicated head or foot regions, and arrested budding process in *Ho\_CR*, tentacle shrinking, head loss, body column stenosis in *Ho\_CS*. **(D)** Similar distribution of testis number in *Ho\_CS* and *Ho\_CR* cohorts maintained at 10°C for 25 days. Animals that did not develop testes were not included. **(E)** Survival of *Ho\_CS* animals according to the number of testes they produce. **(F)** Scheme showing the procedure for testing the reversibility of aging. At day-0 seven *Ho\_CS* cohorts (for each cohort n=20)

were separated from the 18°C main culture, one was maintained at 18°C (top line) whereas the others were transferred to 10°C. At each indicated time-point, one cohort was moved back to 18°C, while one cohort remained at 10°C throughout the experiment (blue bottom line). Animals were fed twice a week all through the experiment.

**(G)** Representative phenotypes of animals maintained either at 18°C (upper row) or at 10°C (middle row) or moved from 10°C to 18°C at day-9, day-25 or day-35 (lower row). The fraction of animals appearing healthy when returned from 10°C to 18°C is 70% (14/20), 35% (7/20) after 5% (1/20) respectively. After 35 days at 10°C, animals no longer recover, the single animal still alive 23 days after the switch back to 18°C died in the following days. Approximately 50% animals returned to 18°C at day-9 had shown first signs of sexual traits. Upon return to 18°C, testes of these animals stopped develop and resorbed. **(H-N)** Observed percentages of surviving (I), budding (J), sexually differentiating (K), dysmorphic (L), or touch-responsive (M) animals when maintained at 10°C over 60 days. All parameters were recorded five times a week except the feeding behavior (N) recorded only twice. For measuring the survival rate, buds produced during that period were removed from the culture soon after detachment, thus not included in the total animal number (I). The observed peaks of budding are caused by the feeding rhythm (twice a week, J). Contractibility was measured by stimulating briefly the peduncle region with tweezers and the percentage of animals contracting upon stimuli was recorded (M). The efficiency of the feeding behavior was assessed one hour after feeding as the percentage of animals with preys inside the gastric cavity (N). Animals able to catch preys with tentacles but unable to transfer it to the gastric cavity were excluded.

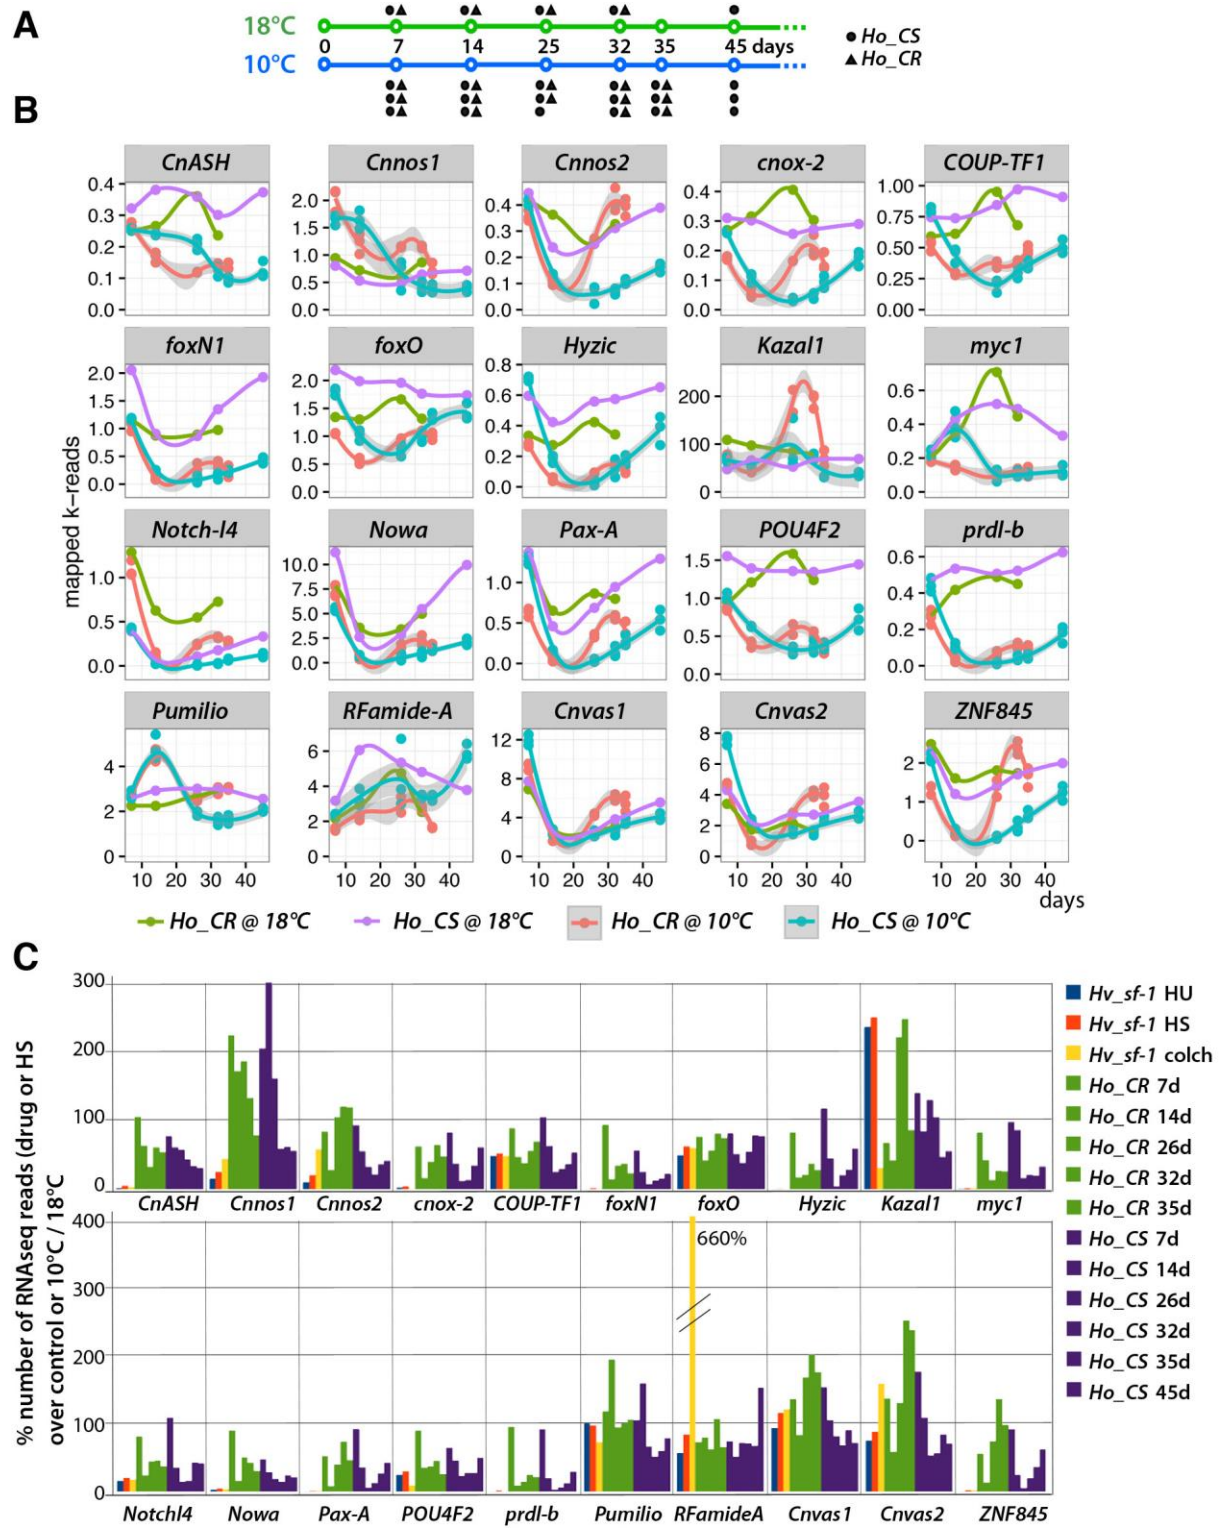

Figure S2: RNA-seq profiles of 20 genes expressed in interstitial cell lineages in *Ho\_CS* and *Ho\_CR* animals maintained at 18°C or transferred to 10°C.

(A) Scheme describing the procedure used for quantitative RNA-seq analysis of aging. RNA samples were collected at indicated time points from *Ho\_CS* and *Ho\_CR* animals either maintained as a unique cohort at 18°C or as three distinct parallel cohorts at 10°C. (B) Individual RNA-seq profiles of 20 evolutionarily-conserved genes predominantly expressed in the interstitial cell lineage in *H. vulgaris* as described in ref. (Wenger et al., 2016). See the access of the corresponding sequences in **Table-S1**. Note the drastic but transient down-regulation of most genes in *Ho\_CR* and *Ho\_CS* animals maintained at 10°C, highlighting the partial elimination followed by the recovery of the corresponding cell types. (C) Comparative RNA-seq analysis of i-cell gene expression in *Hv\_sf-1* animals 10 days after exposure to HU (blue), heatshock (HS, red), colchicine (yellow), or in *Ho\_CR* (green) and *Ho\_CS* (purple) at various time points after transfer to 10°C. Values were normalized on values measured in untreated *Hv\_sf-1* animals (blue, red, yellow and green values) or in *Ho* animals maintained at 18°C (purple). All data are available on HydrATLAS.unige.ch.

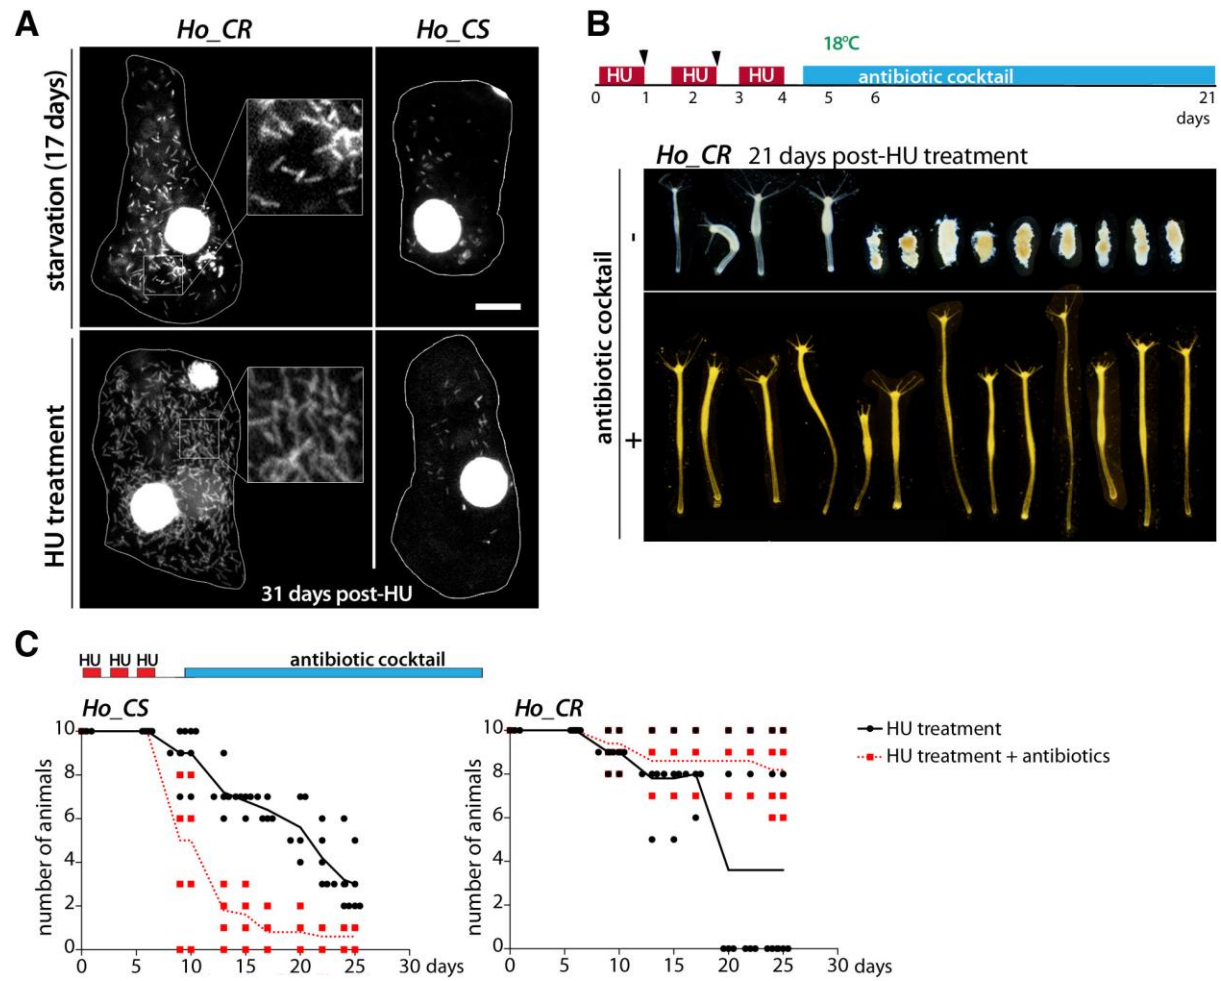

Figure S3: Distinct bacterial loads in *Ho\_CR* and *Ho\_CS* epithelial cells

(A) Abundance of commensal intra-epithelial bacteria in epithelial cells of *Ho\_CS* and *Ho\_CR* either starved for 17 days (upper row) or treated with HU as indicated in B and pictured 31 days later (lower row). Bacteria are visualized by DAPI staining. Scale bar: 10  $\mu$ m. (B) Animal morphologies of *Ho\_CR* cohorts treated with HU and subsequently exposed or not to a cocktail of antibiotics. (C) Survival rate of 5 cohorts of 10 HU-treated animals exposed or not to a cocktail of antibiotics. The antibiotic treatment is toxic for *Ho\_CS* animals while improving the survival rate of *Ho\_CR* ones.

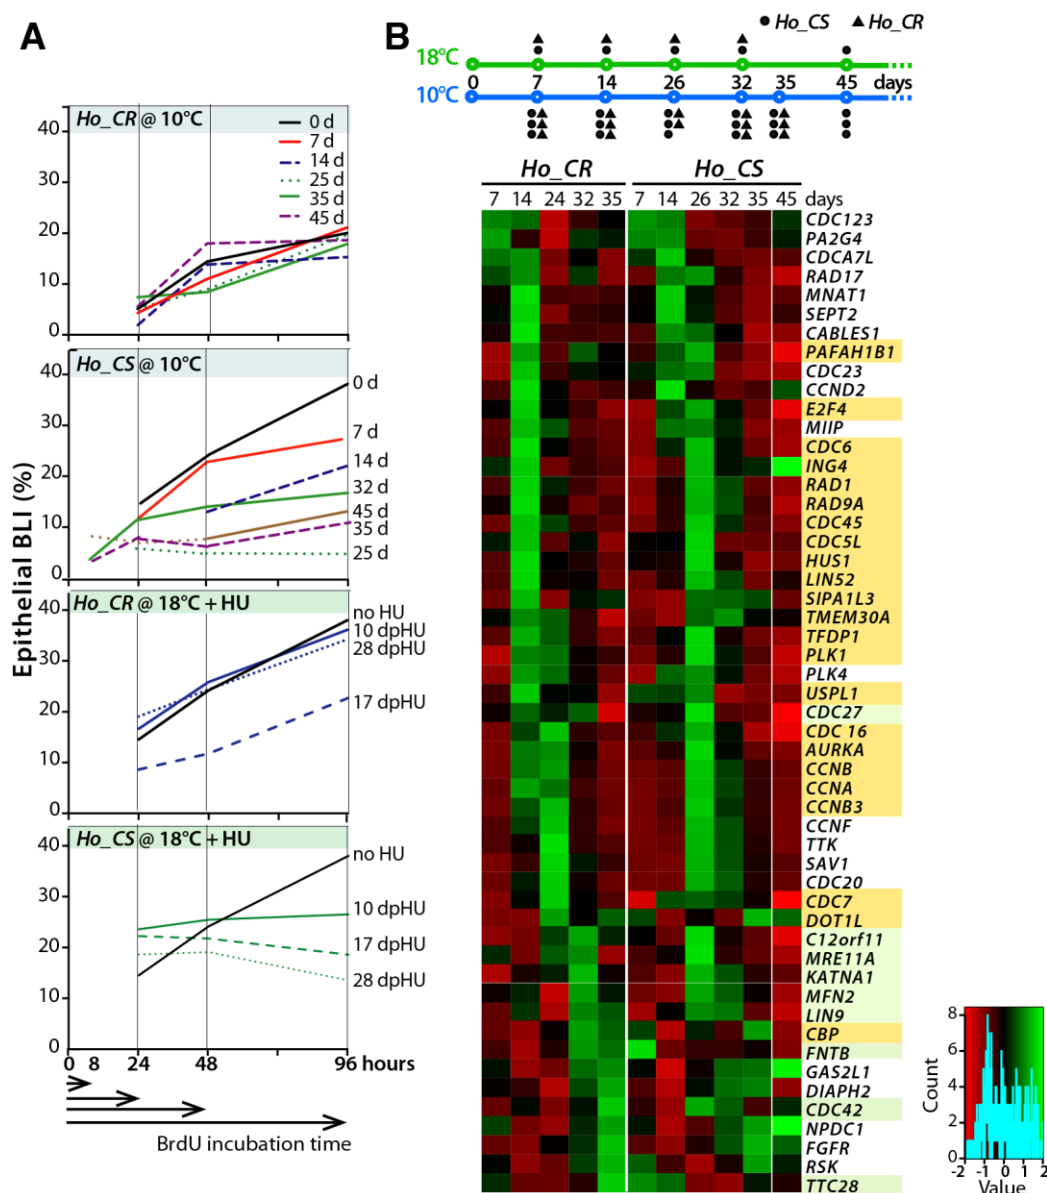

Figure S4: Comparative analysis of epithelial proliferation in *Ho\_CS* and *Ho\_CR* animals.

(A) Cycling activity of ESC in *Ho\_CS* and *Ho\_CR* animals transferred to 10°C (two upper graphs) or maintained at 18°C after HU treatment (two lower graphs). The BrdU-labeling index (BLI) was measured 7, 14, 25, 32, 45, 35 days (d) after transfer to 10°C, or 10, 17 or 28 days post-HU release (dpHU). For each time point, animals were exposed to BrdU for 24, 48 or 96 hours, then macerated for immunodetection. The fraction of BrdU-positive ESCs was counted to measure the linear progression of the cumulative eBLIs. The *Ho\_CS* and *Ho\_CR* cultures tested at 10°C were not fed at the same rhythm in the weeks preceding the transfer to 10°C, four times a week for *Ho\_CS*, twice a week for *Ho\_CR*, explaining the different eBLI values at day-0. This experiment was performed independently of the experiment shown in Figure 3D.

(B) Quantitative RNA-seq analysis of 52 *Hydra* genes orthologous to human genes annotated as involved in “cell cycle” or “cell proliferation” ([www.uniprot.org](http://www.uniprot.org), Table-S2). The experimental RNA-seq procedure is that described in Figure S2A. The heatmap shows relative fold changes defined as the ratio between the values measured at 10°C at a given time point over the value measured at 18°C at same or similar time point in *Ho\_CR* and *Ho\_CS* animals. Yellow and green backgrounds highlight genes whose modulations are delayed or advanced in *Ho\_CS* compared to *Ho\_CR* respectively. See the individual profile of each gene in Figure S5 and access to the corresponding sequences in Table S2.

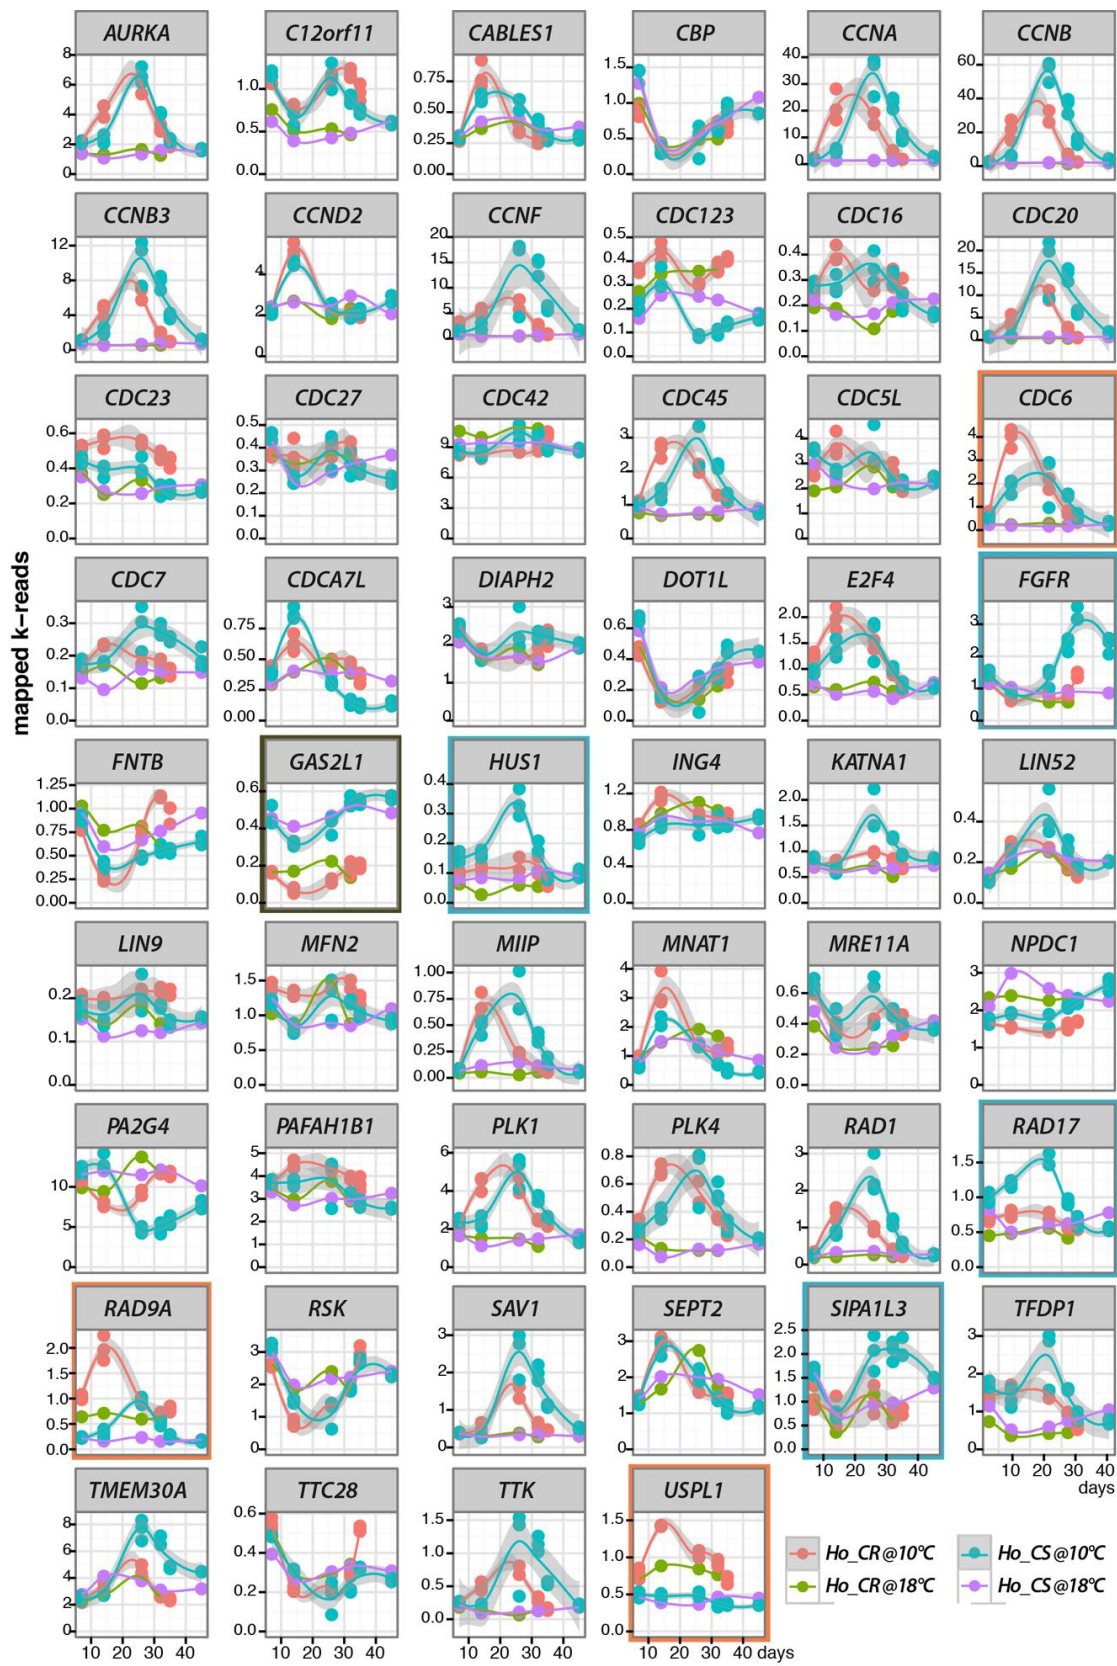

Figure S5: RNA-seq profiles of 52 *Hydra* orthologs to mammalian genes involved in cell cycle and/or cell proliferation

RNA-seq expression profiles of 52 cell cycle / cell proliferation genes tested in *Ho\_CR* and *Ho\_CS* animals maintained at 18°C or at 10°C as depicted in **Fig. S2A, S4B**. Note the delayed up-regulation of *CCNA*, *CCNB*, *CDC16*, *CDC45*, *MIIP*, *PLK1*, *PLK4*, *RAD1*, in *Ho\_CS* when compared to *Ho\_CR*. Orange frames indicate genes up-regulated in *Ho\_CR* at 10°C at much higher level than in *Ho\_CS* (*CDC6*, *MNAT1*, *RAD9A*, *USPL1*), blue frames indicate genes up-regulated in *Ho\_CS* at 10°C at much higher level than in *Ho\_CR* (*CCNF*, *CDC20*, *FGFR*, *HUS1*, *KATNA1*, *LIN52*, *RAD17*, *SAV1*, *SIPA1L3*, *TFDPI*, *TTK*), black frames indicate genes that exhibit a constitutively sustained up-regulation in *Ho\_CS* when compared to *Ho\_CR* (*GAS2L1*). Values on x axis = days, on y axis = mapped k-reads. For access to the corresponding sequences, see **Table S2**.



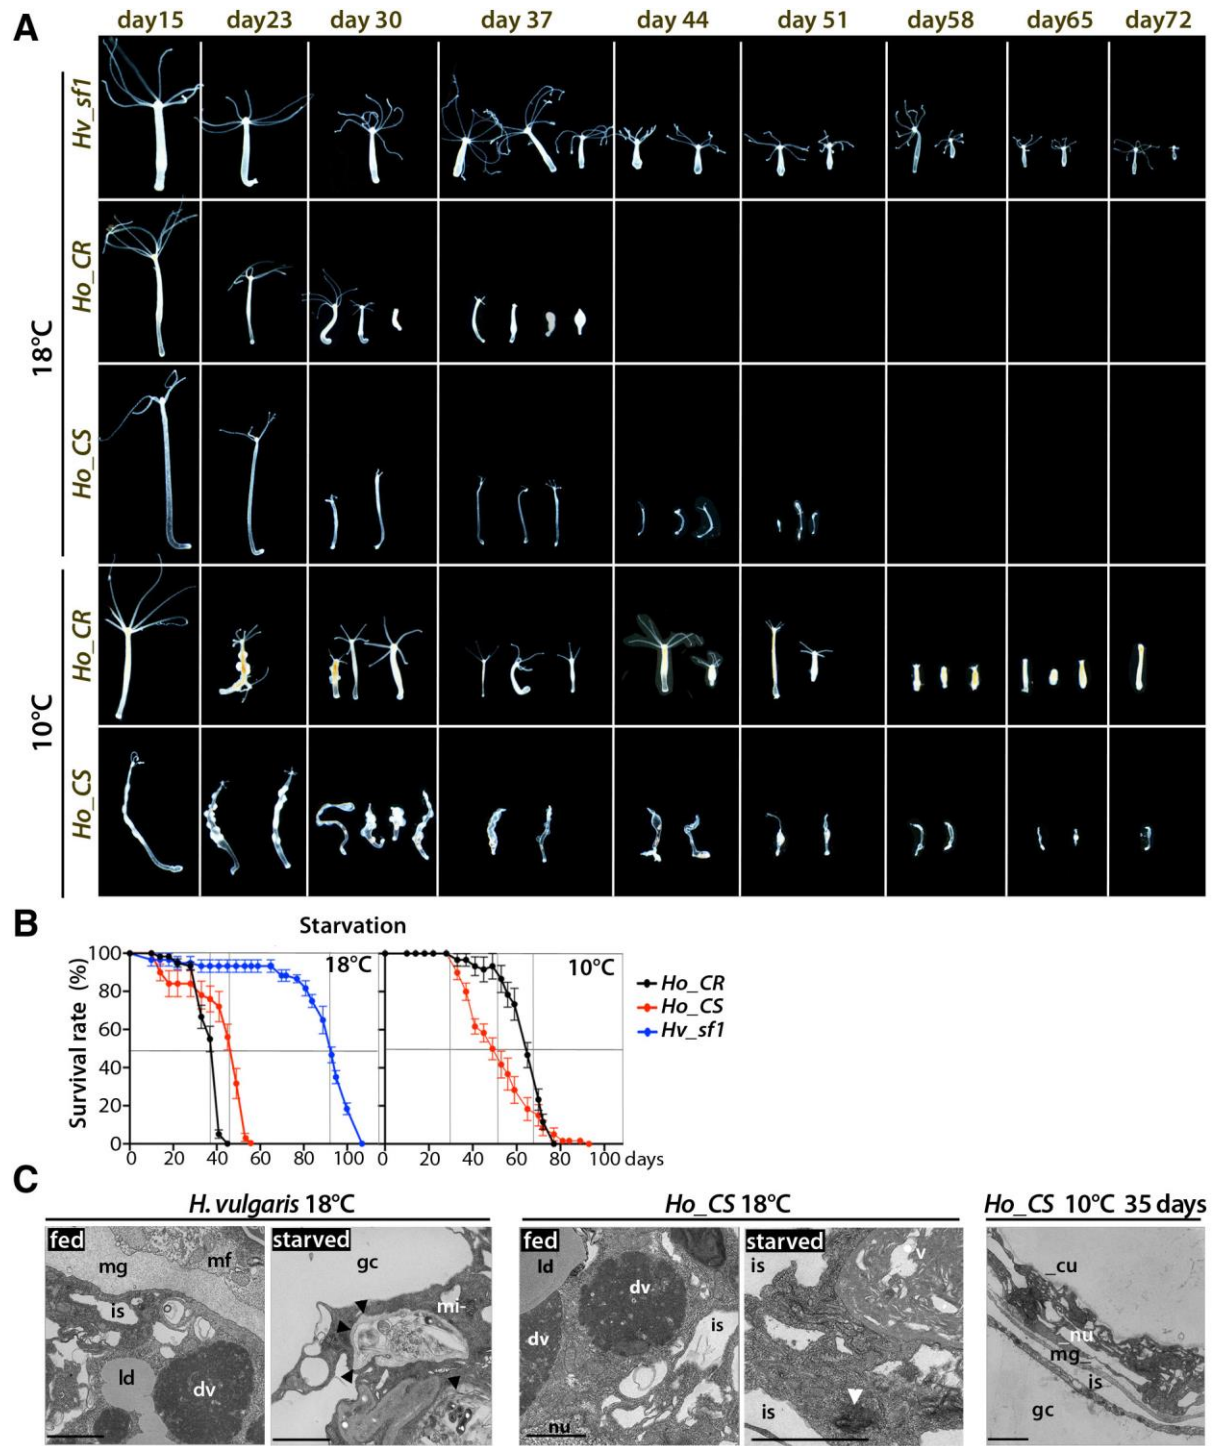

### Figure S6: Starvation-induced phenotypes in *Ho\_CR*, *Ho\_CS* and *H. vulgaris* animals

(A, B) Morphological alterations (A) and survival rates (B) recorded in starved *Hv\_sf1*, *Ho\_CR*, *Ho\_CS* animals maintained at 18°C or 10°C (for each condition n = 6x 10 animals). At 18°C *Ho\_CR* animals die by day-40 without showing morphological alterations typical of aging, while *Ho\_CS* animals commonly die later, by day-58, but exhibit aging-like morphological alterations from day-30. Note that *Hv\_sf1* animals resist about 50 days longer to starvation than *Ho\_CS* and *Ho\_CR* animals. At 10°C, starved *Ho\_CR* animals undergo spermatogenesis and maintain their physiological fitness up to day-51, while starved *Ho\_CS* animals exhibit aging signs from day-15, similar to those observed in animals fed twice a week (see **Figure 1D**). The two *Ho* strains exhibit a similar resistance to starvation, enhanced in case of *Ho\_CR* animals maintained at 10°C when compared to 18°C. (C) TEM views of body column sections from *Hv* (Basel strain) and *Ho\_CS* animals either maintained at 18°C regularly fed or starved for 11 days, or maintained at 10°C for 35 days. Black arrowheads: autophagosome, white arrowhead: aggregate. Note the dramatically reduced gastrodermis after 35 days at 10°C in *Ho\_CS* animals. Abbreviations: cu: cuticle, dv: digestive vacuole, gc: gastric cavity, is: intracellular space, ld: lipid droplets, mf: myofibril, mg: mesoglea, mi: mitochondria, nu: nucleus. Scale bars = 2 µm.

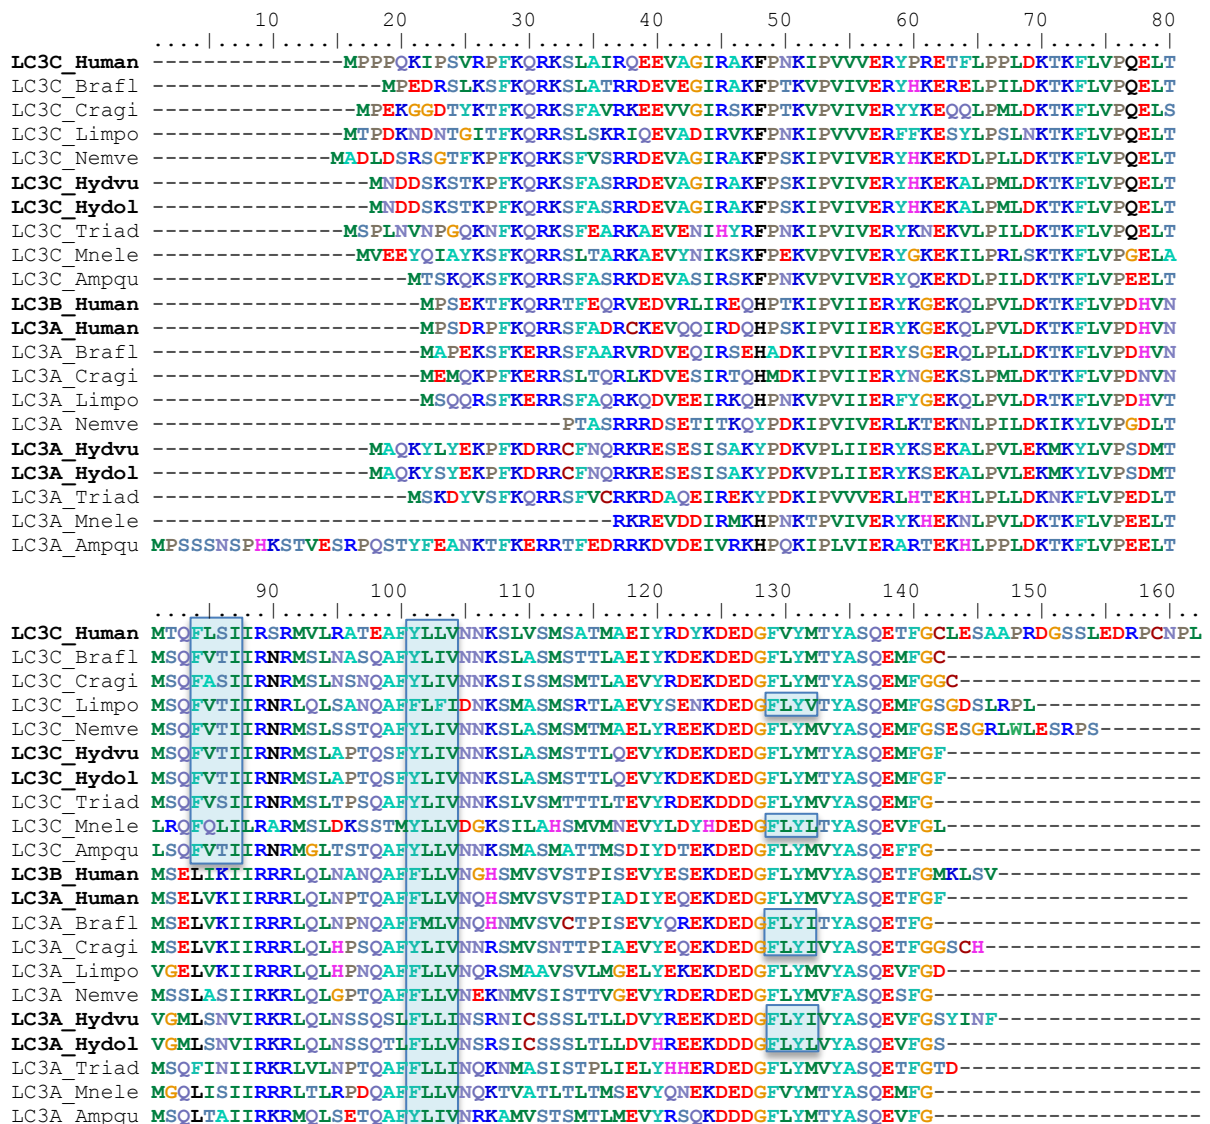

Figure S7: Alignment of the metazoan LC3/ATG8 protein sequences

The blue boxes indicate the LIR motifs with the core consensus sequence: [W/F/Y]xx[L/I/V] (Birgisdottir et al., 2013). Species abbreviations and accession numbers: **Ampqu**: *Amphimedon queenslandica* (demosponge, Porifera), LC3A: XM\_003385475.2, LC3C: XM\_003385524.2 (NCBI); **Brafl**: *Branchiostoma floridae* (amphioxus, Cephalochordata), LC3A: XM\_002612378.1, LC3C: XM\_002596383.1 (NCBI); **Cragi**: *Crassostrea gigas* (oyster, Mollusca), LC3A: XM\_011449392.1, LC3C: XM\_011417532.1 (NCBI); **Human**: LC3A: Q9H492, LC3B: Q9GZQ8, LC3C: Q9BXW4 (Uniprot); **Hydol**: *Hydra oligactis* (Cnidaria), LC3A: S043022c1g3\_i01, R033468c0g1\_i01, LC3C: S040689c0g1\_i01, R036327c0g1\_i01; **Hydву**: *Hydra vulgaris* (Cnidaria), LC3A: seq54452, LC3C: c26188\_g3\_i03, T2M644 (Uniprot); **Limpo**: *Limulus polyphemus* (horseshoe crab, Arthropoda), LC3A: XM\_013930807.1, LC3C: XM\_013919901.1 (NCBI); **Mnele**: *Mnemiopsis leidyi* (combjelly, Ctenophora), LC3A: ML1904, LC3C: ML0233 (found in genome from compagen); **Triad**: *Trichoplax adhaerens* (Placozoa), LC3A: XM\_002108002.1, LC3C: XM\_002113115.1 (NCBI). See accession numbers of *Hydra* sequences in **Table S3** and sequences on HydrATLAS.

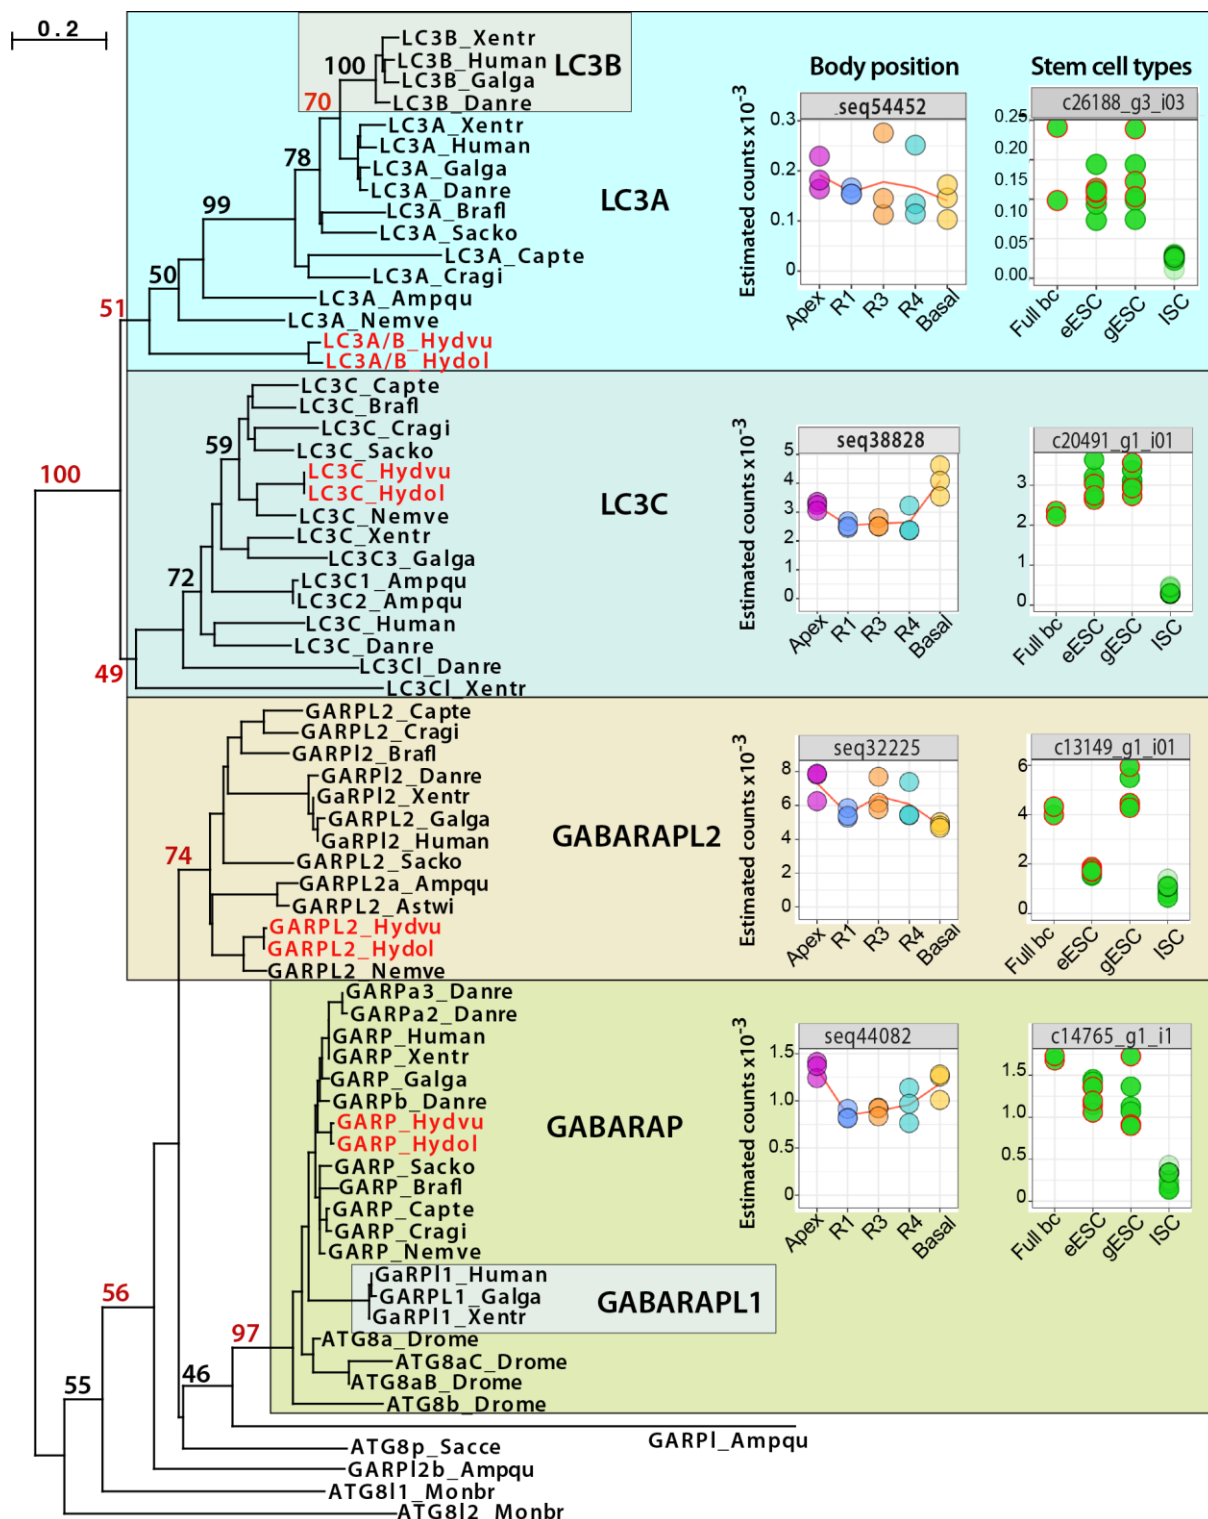

Figure S8: Phylogenetic analysis of the metazoan LC3/ATG8 gene families and RNA-seq profiles of the four *H. vulgaris* LC3-related genes

Phylogenetic tree of the LC3/ATG8 protein sequences aligned with MUSCLE and built with PhyML 3.0, tested with 100 bootstraps. *Hydra* sequences are written red. Species code is as follows: *Ampqu*: *Amphimedon queenslandica* (demo-sponge); *Capte*: *Capitella teleta* (polychaete worm); *Cragi*: *Crassostrea gigas* (oyster); *Danre*: *Danio rerio* (zebrafish); *Drome*: *Drosophila melanogaster* (fruitfly); *Galga*: *Gallus gallus* (chick); *Hydvu*: *Hydra vulgaris*; *Hydol*: *Hydra oligactis*; *Monbr*: *Monosiga brevicollis* (choanoflagellate); *Nemve*: *Nematostella vectensis* (sea anemone); *Sacce*: *Saccharomyces cerevisiae* (yeast); *Sacko*: *Saccoglossus kowalevskii* (acorn worm); *Xentr*: *Xenopus tropicalis* (Western clawed frog). The four main families MAP1LC3A (LC3A), MAP1LC3C (LC3C), GABARAPL2 (GARPL2) and GABARAP (GARP) include sequences from deuterostomes,

protostomes, cnidarians and poriferans. The GARPI\_Ampqu sequence appears related to GABARAP although highly derived, while the two families LC3B and GABARAPL1 are vertebrate-specific duplications of LC3A and GABARAP respectively. Note the *Drosophila* sequences that all cluster in the GABARAP family. By contrast the non-metazoan sequences from yeast or choanoflagellates do not cluster in any of these four metazoan families. The graphs on the right show the RNA-seq profiles of the four LC3/ATG8 family members expressed in homeostatic *H. vulgaris*, along the body column (bc, left) and in each stem cell populations (right) as reported in ref. (Wenger et al., 2016; Wenger et al., 2019). Abbreviations: R1: upper body column, R3: upper mid-gastric region, R4: lower mid-gastric region, Foot: peduncle and basal disk; eESC: epidermal epithelial stem cells; gESC: gastrodermal epithelial stem cells; ISC: interstitial stem cells.

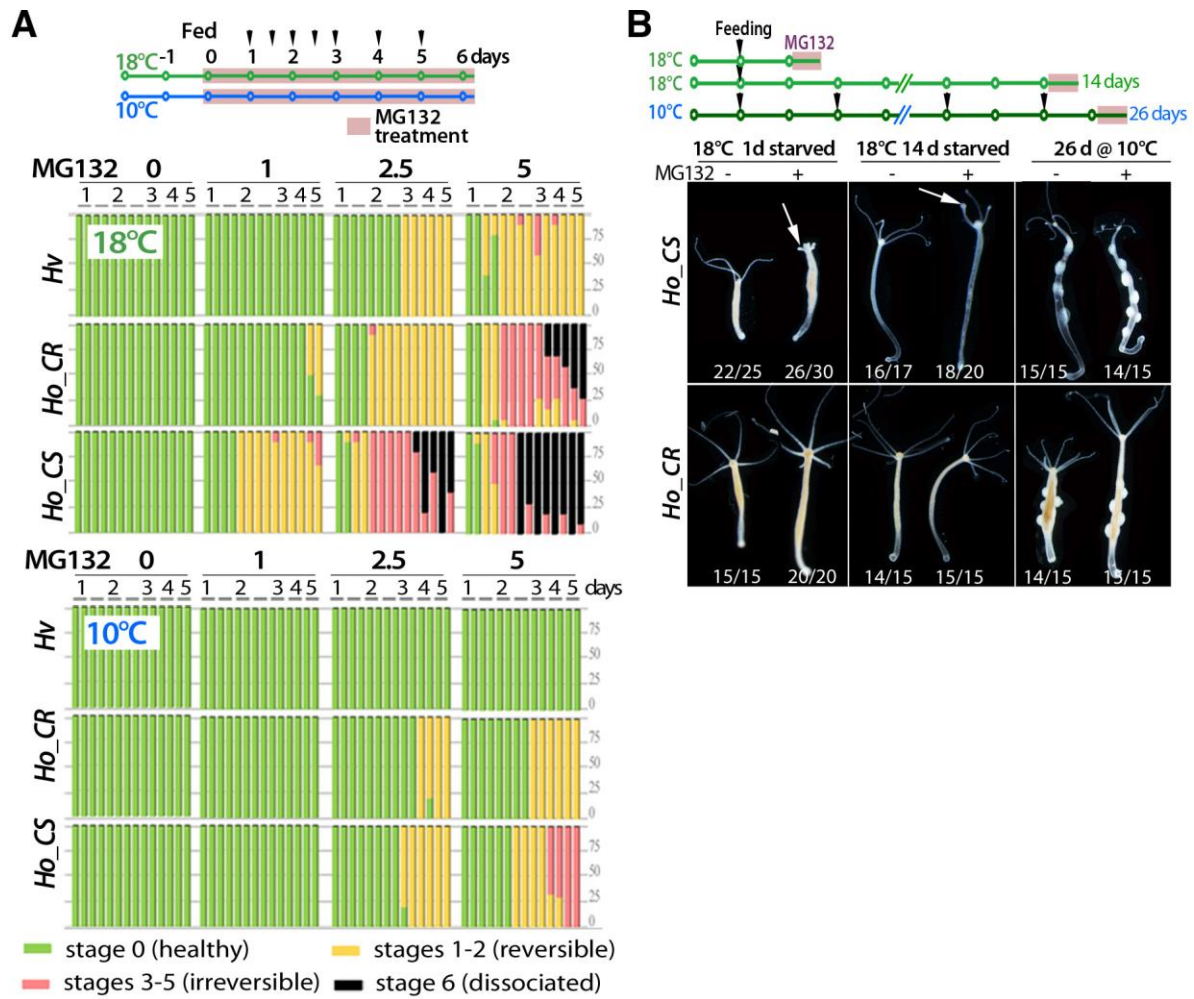

Figure S9: Different sensitivity to MG132 in *Ho\_CS*, *Ho\_CR* and *Hv*.

(A) Toxicity recorded in animals ( $n = 2 \times 10$  /strain) maintained at 18°C (top) or 10°C (bottom) and continuously exposed to the proteasome inhibitor MG132 at indicated concentrations (0, 1, 2.5 or 5  $\mu\text{M}$ ) for 1, 2, 3, 4 or 5 days. (B) Resistance to proteasome inhibition tested in *Ho\_CS* and *Ho\_CR* animals exposed to MG132 (5  $\mu\text{M}$ ) for 16 hours and then pictured live. When maintained at 18°C, animals were either fed 4x a week or starved for 14 days, at 10°C animals were fed twice a week. Note the higher sensitivity of *Ho\_CS* animals that rapidly exhibit shortened, “ball-shaped” tentacles (arrows) as signs of stress.

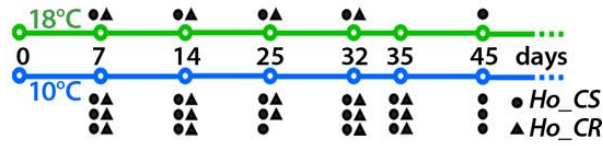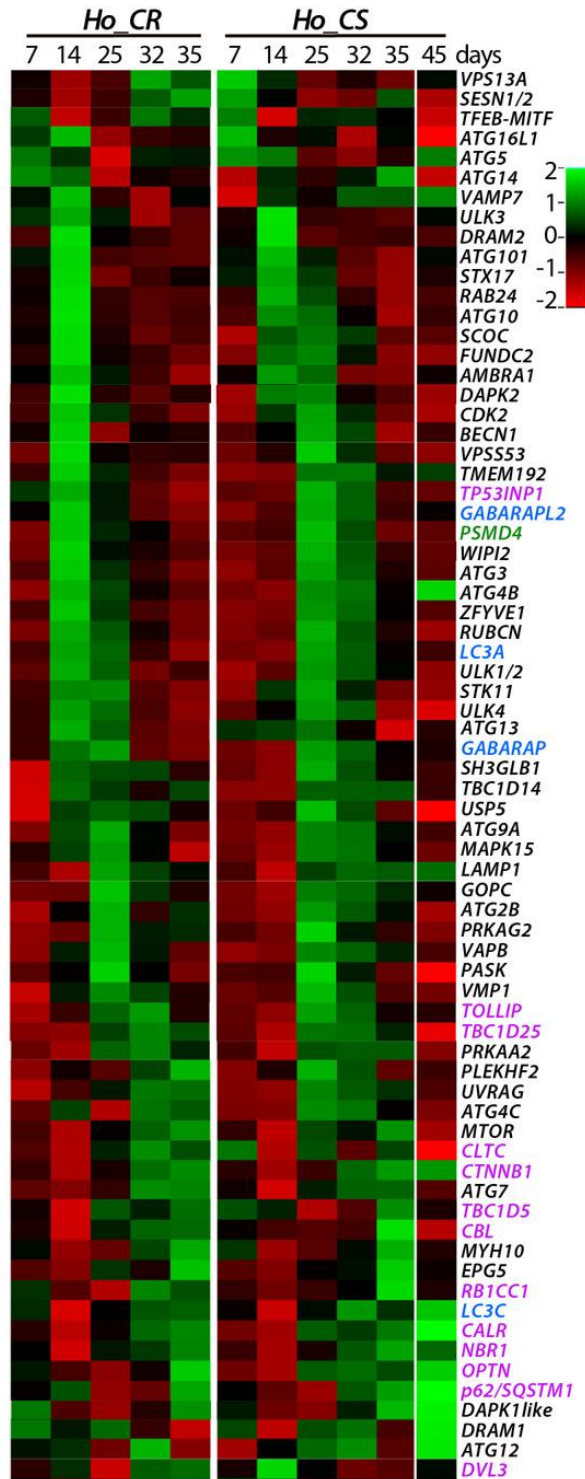

### Figure S10: Comparative transcriptomic analysis of 75 *Hydra* orthologs to mammalian autophagy genes in *Ho\_CS* and *Ho\_CR*

Upper scheme: Experimental design of the quantitative RNA-seq analysis. RNAs from *Ho\_CR* and *Ho\_CS* animals were prepared at indicated time points with biological triplicates for animals maintained at 10°C. Lower panel: Heatmap showing the log<sub>2</sub> fold changes of RNA-seq levels of 75 *Hydra* genes orthologous to human genes involved in autophagy. Fold changes are defined as ratio between the values measured at 10°C at a given time point over the value measured at 18°C at same or similar time point in a given strain. For technical details, see the Methods section. Gene names written **black** encode regulators of autophagy initiation and progression, **purple**: autophagy receptors or adaptors interacting with LC3/ATG8, **blue**: members of the LC3-GABARAP family, **green**: proteasome components. See the corresponding individual expression profiles in **Figure S11** and access to corresponding sequences in **Table-S3**. Note in *Ho\_CS* the delayed activation of most autophagy genes and the late up-regulation of *NBR1* and *p62/SQSTM1*.



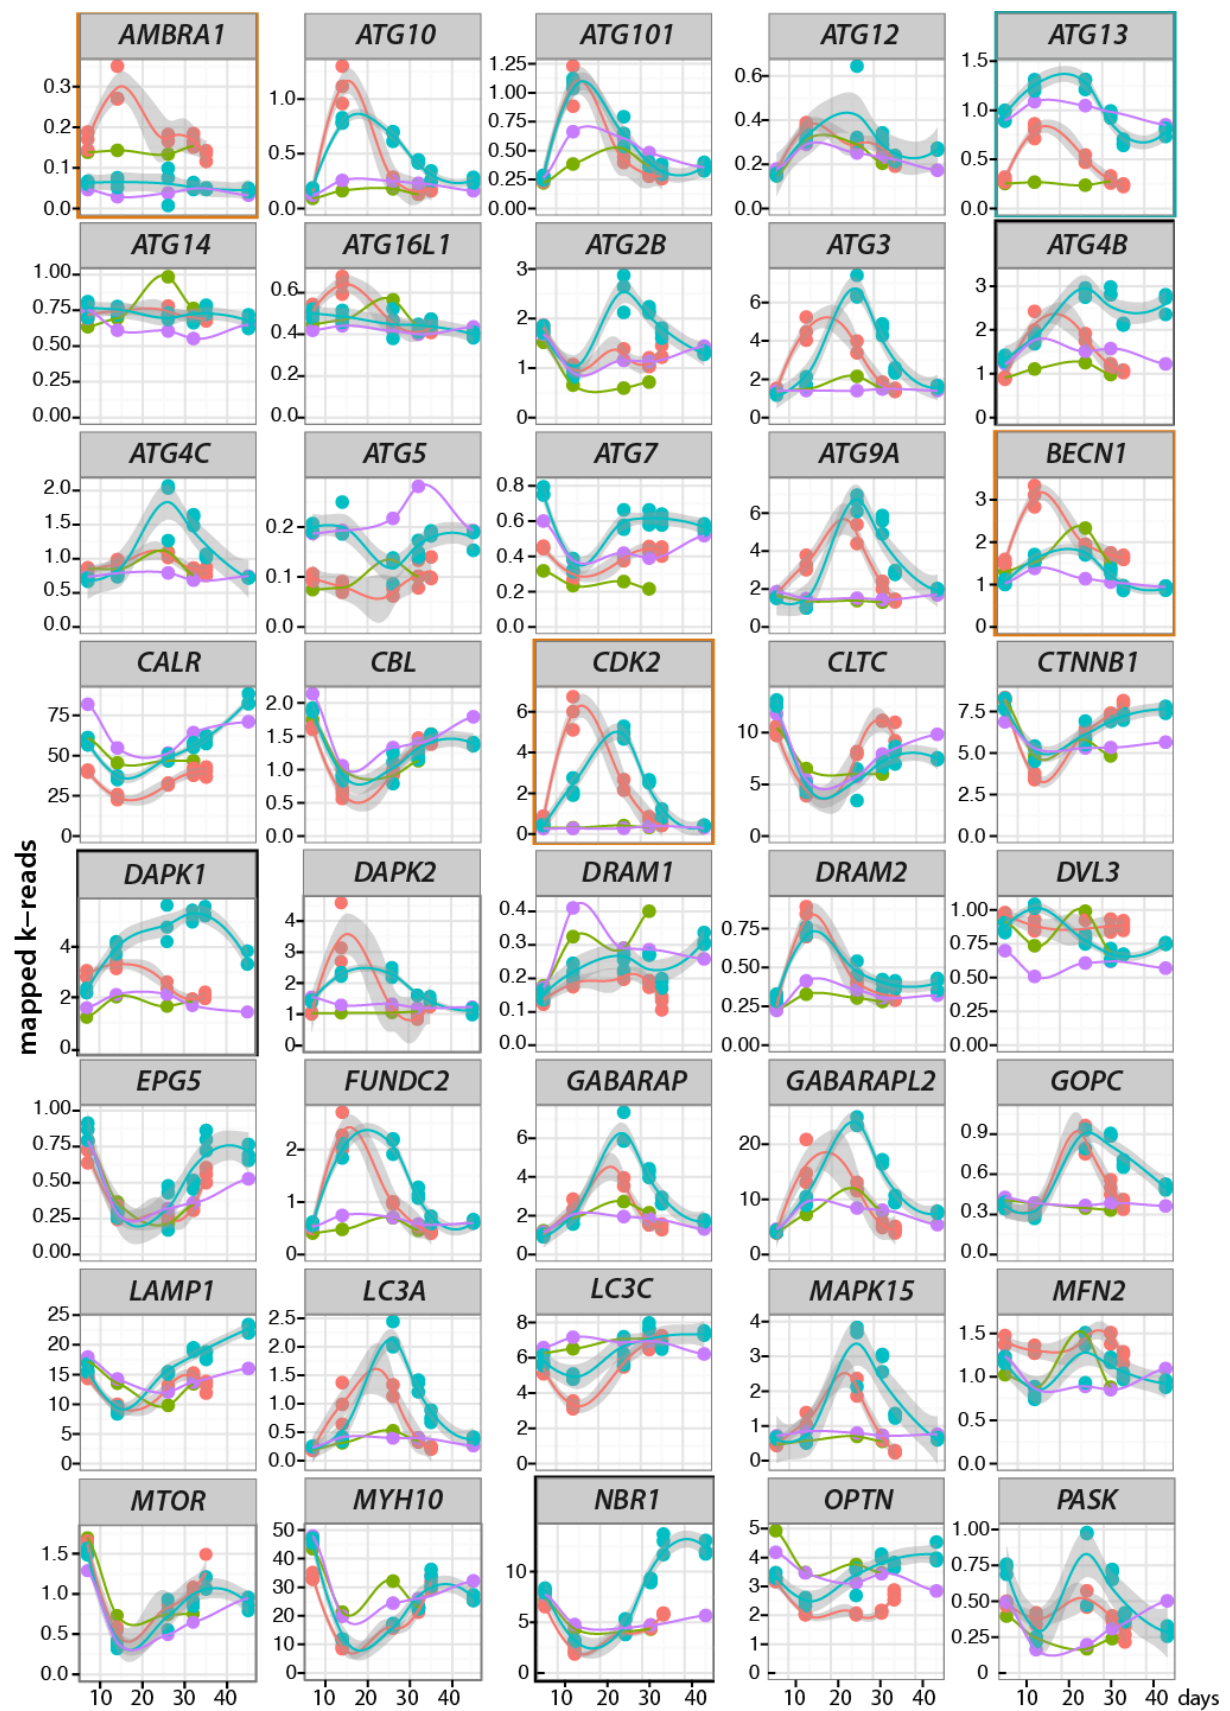

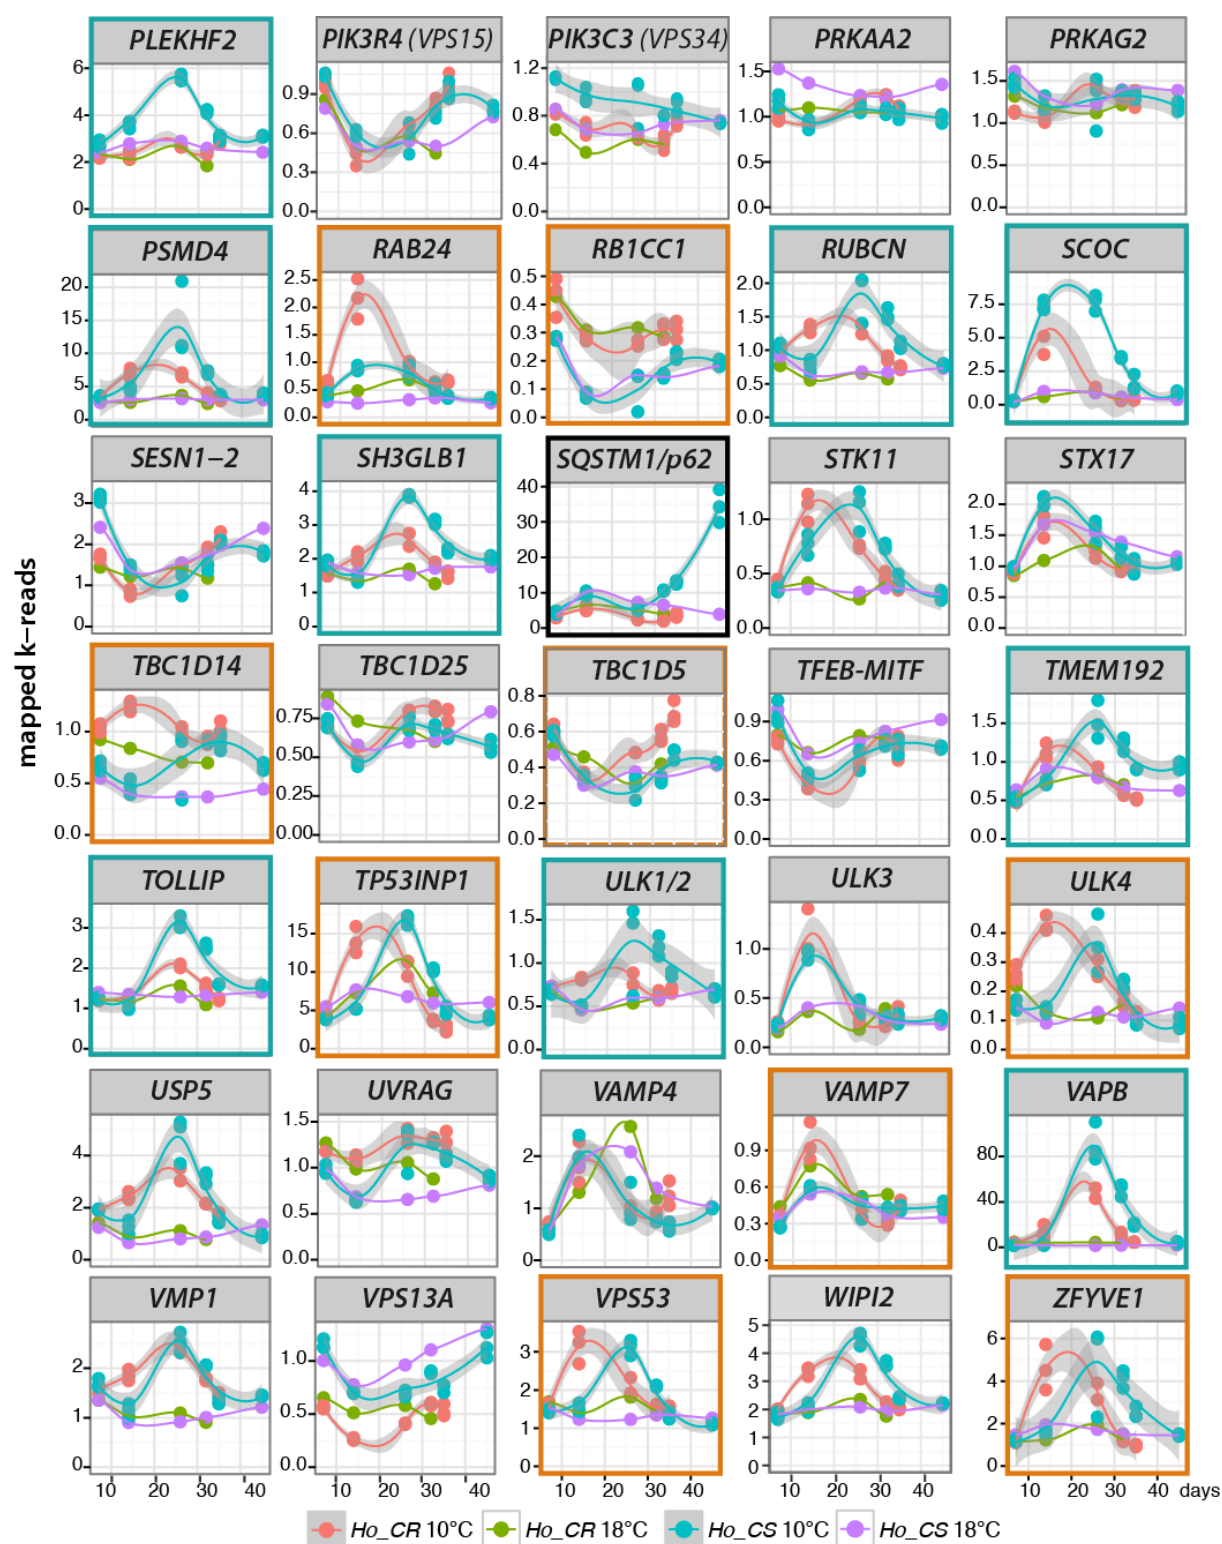

|                                                                                                                                                                          |                                                                                                                                                                                                                                                                                                                                      |
|--------------------------------------------------------------------------------------------------------------------------------------------------------------------------|--------------------------------------------------------------------------------------------------------------------------------------------------------------------------------------------------------------------------------------------------------------------------------------------------------------------------------------|
| <b>21/51 genes transiently up-regulated in both strains but delayed by 10 days in <i>Ho_CS</i></b> (10/20 exhibit higher levels in <i>Ho_CS</i> – underlined -)          | <i>ATG3</i> , <i>ATG9A</i> , <i>ATG13</i> , <i>CDK2</i> , <i>DAPK2</i> , <i>GABARAP</i> , <i>GABARAPL2</i> , <i>LC3A</i> , <i>PSMD4</i> , <i>RUBCN</i> , <i>SCOC</i> , <i>SH3GLB1</i> , <i>STK11</i> , <i>TBC1D14</i> , <i>TMEM192</i> , <i>TP53INP1</i> , <i>ULK1/2</i> , <i>ULK4</i> , <i>VPS53</i> , <i>WIPI2</i> , <i>ZFYVE1</i> |
| <b>14/51 genes similarly transiently up-regulated in <i>Ho_CS</i> and <i>Ho_CR</i></b> , peaking at day14 or day25, (underlined: exhibit higher levels in <i>Ho_CS</i> ) | <i>ATG10</i> , <i>ATG101</i> , <i>ATG12</i> , <i>ATG9A</i> , <i>DRAM2</i> , <i>FUNDC2</i> , <i>GOPC</i> , <i>MAPK15</i> , <i>STX17</i> , <i>TOLLIP</i> , <i>ULK3</i> , <i>USP5</i> , <i>VAMP4</i> , <i>VAPB</i>                                                                                                                      |
| <b>5/51 up-regulated in <i>Ho_CR</i></b> but poorly in <i>Ho_CS</i>                                                                                                      | <i>AMBRA1</i> , <i>ATG16L1</i> , <i>BECN1</i> , <i>RAB24</i> , <i>VAMP7</i>                                                                                                                                                                                                                                                          |
| <b>4/51 up-regulated in <i>Ho_CS</i></b> , not or poorly in <i>Ho_CR</i>                                                                                                 | <i>ATG2B</i> , <i>ATG4C</i> , <i>PLEKHF2</i> , <i>TOLLIP</i>                                                                                                                                                                                                                                                                         |
| <b>7/51 genes sustainably up-regulated in <i>Ho_CS</i></b> , i.e. showing a temporal accumulation                                                                        | <i>ATG4B</i> , <i>ATG7</i> , <i>CALRC</i> , <i>DAPK1</i> , <i>LAMP1</i> , <i>NBR1</i> , <i>p62/SQSTM1</i>                                                                                                                                                                                                                            |

### Figure S11: RNA-seq profiles of 75 *Hydra* orthologs to mammalian autophagy genes

RNA-seq expression profiles of 75 autophagy genes tested in *Ho\_CR* and *Ho\_CS* animals maintained at 18°C or at 10°C as depicted in **Figure S10**. Orange frames indicate genes up-regulated in *Ho\_CR* at 10°C but not at all or less in *Ho\_CS*, blue frames indicate genes up-regulated in *Ho\_CS* at 10°C but not at all or less in *Ho\_CR*, black frames indicate genes that exhibit a sustained up-regulation at late time-points in *Ho\_CS* but not in *Ho\_CR*. Values on x axis = days, on y axis = mapped k-reads. For the corresponding sequences, see **Table S3**.



### Figure S12: Alignment of vertebrate and non-vertebrate p62/SQSTM1 protein sequences

The alignment was obtained on MUSCLE ([www.ebi.ac.uk/Tools/msa/muscle/](http://www.ebi.ac.uk/Tools/msa/muscle/)) and manually corrected to align the functional domains as listed in refs (Seibenhener et al., 2004, Birgisdottir et al., 2013, Bitto et al., 2014): **PB1**, Phox and Bem1 domains (blue) involved in protein kinase binding; **ZZ**, ZZ-type zinc finger domain (green); **NLS1** and **NLS2**, nuclear localization signals 1 and 2 (turquoise); **NES**, nuclear export signal (grey); **LIR**, LC3- interacting region (green-yellow); **KIR**, KEAP-interacting region (beige); **UBA**, ubiquitin-associated domain (purple). In non-vertebrate sequences, the putative LIR, NLS and NES motifs were manually identified following the consensus sequence reported in refs (Pankiv et al., 2007) and (Birgisdottir et al., 2013): LIR = x<sub>5</sub>(s) x<sub>4</sub>(dt) x<sub>3</sub>(desg) x<sub>2</sub>(ds) [WFY] x<sub>1</sub>(evtd) x<sub>2</sub>(implt) [LIV] x<sub>4</sub>(pdsr) x<sub>5</sub>; NLS = [R] [K] x<sub>1</sub>(vs) [K] or [K] [R] x<sub>1</sub>(vs) [R]; NES = [L] x<sub>1</sub> x<sub>2</sub> x<sub>3</sub> (2, 3) [LIVFM] x<sub>5</sub> x<sub>6</sub> (2 or 3) [LI] x<sub>7</sub> [LI]. The UBA sequence used for raising the anti-*Hydra* p62/SQSTM1 antibody is underlined (KESKLER ....ALSPAK). Species code and accession numbers are given in **Figure S13A** and **Table S3**.

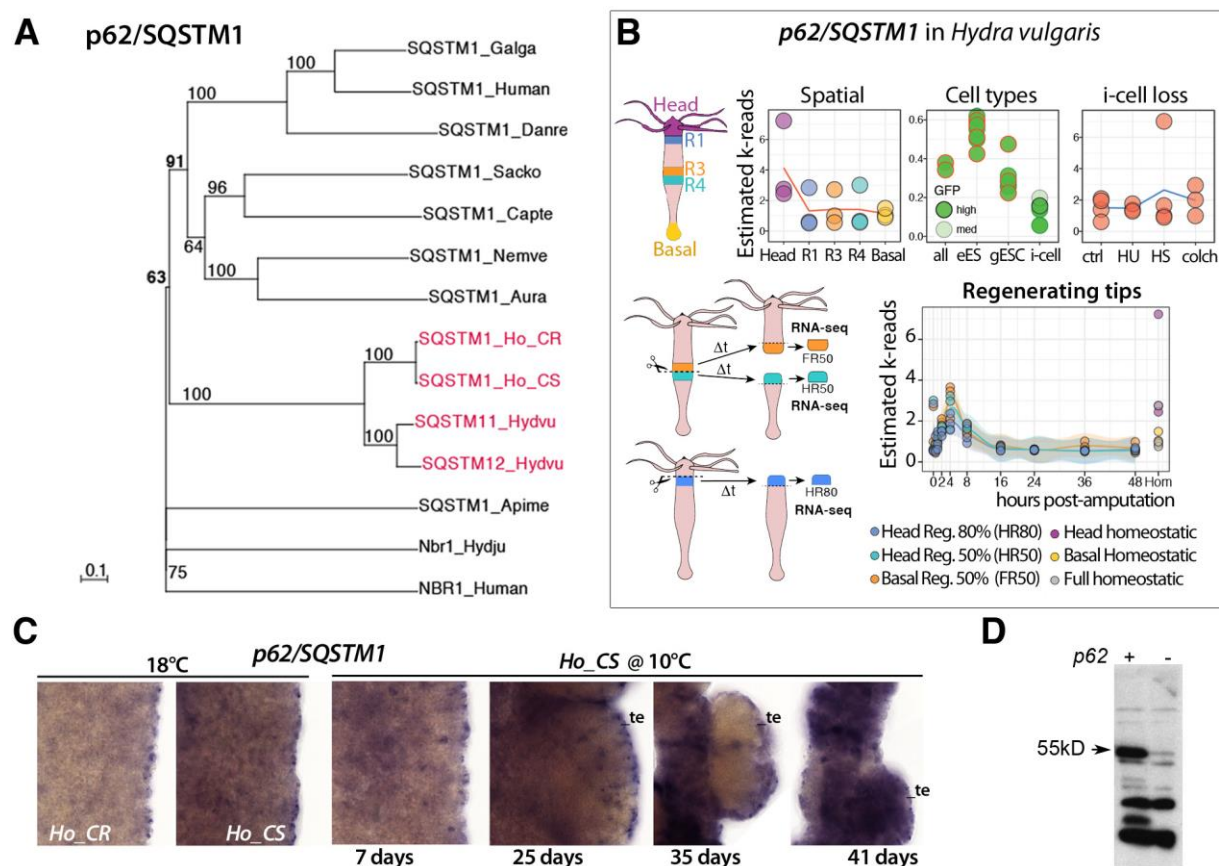

Figure S13: Phylogenetic tree and expression analysis of *p62/SQSTM1* in *Hydra*

(A) Phylogenetic tree of p62/SQSTM1 protein sequences aligned with MUSCLE and built with PhyML 3.0, tested with 500 bootstraps. NBR1 sequences were used as outgroup. Species code and sequence accession numbers are for *Apime*: *Apis mellifera* (XP\_392222.3); *Aurau*: *Aurelia aurita* (Q5EN85); *Capte*: *Capitella teleta* (gb|ELT88176.1); *Danre*: *Danio rerio* (Q6NWE4); *Galga*: *Gallus gallus* (F1NA86); *Human*: Q13501; *Ho\_CS*, *Ho\_CR*: *Hydra oligactis* (see **Table-S3**); *Hydvu*: *Hydra vulgaris* (XP\_004206050.1; T2MDZ6); *Nemve*: *Nematostella vectensis* (A7RN64); *Sacko*: *Saccoglossus kowalevskii* (XP\_002737931.1). (B) RNA-seq profiles of *H. vulgaris* p62/SQSTM1 as reported in (Wenger et al., 2014, Wenger et al., 2016, Wenger et al., 2019). **Body position**: expression measured at 5 distinct levels along the body axis of *H. vulgaris* Jussy strain; **Stem cell types**: expression measured in the three stem cell populations of *H. vulgaris* AEP (after FACS sorting cells of transgenic strains that constitutively GFP in one or the other cell type); **i-cell loss**: expression measured 10 days after the heat-shock or drug-induced elimination of cycling interstitial cells; **Regeneration**: expression measured in regenerating tips at 9 time points of three distinct regenerative processes in *H. vulgaris* Jussy strain (HR50, FR50: head or foot regeneration after mid-gastric bisection; HR80: head regeneration after decapitation). (C) Whole-mount *in situ* hybridization showing an ubiquitous expression of p62/SQSTM1 in *Ho\_CR* and *Ho\_CS* at 18°C, progressively enhanced in epithelial cells of *Ho\_CS* animals undergoing aging. (D) Testing of the anti-*Hydra* p62/SQSTM1 antisera (batch 507) against the *Hydra* p62/SQSTM1 protein expressed in TNT-coupled reticulocyte lysate (Promega) (lane +); the empty vector was used as negative control (lane -). The expected weight of *Ho\_CS* p62/SQSTM1 is 54.53 kD.

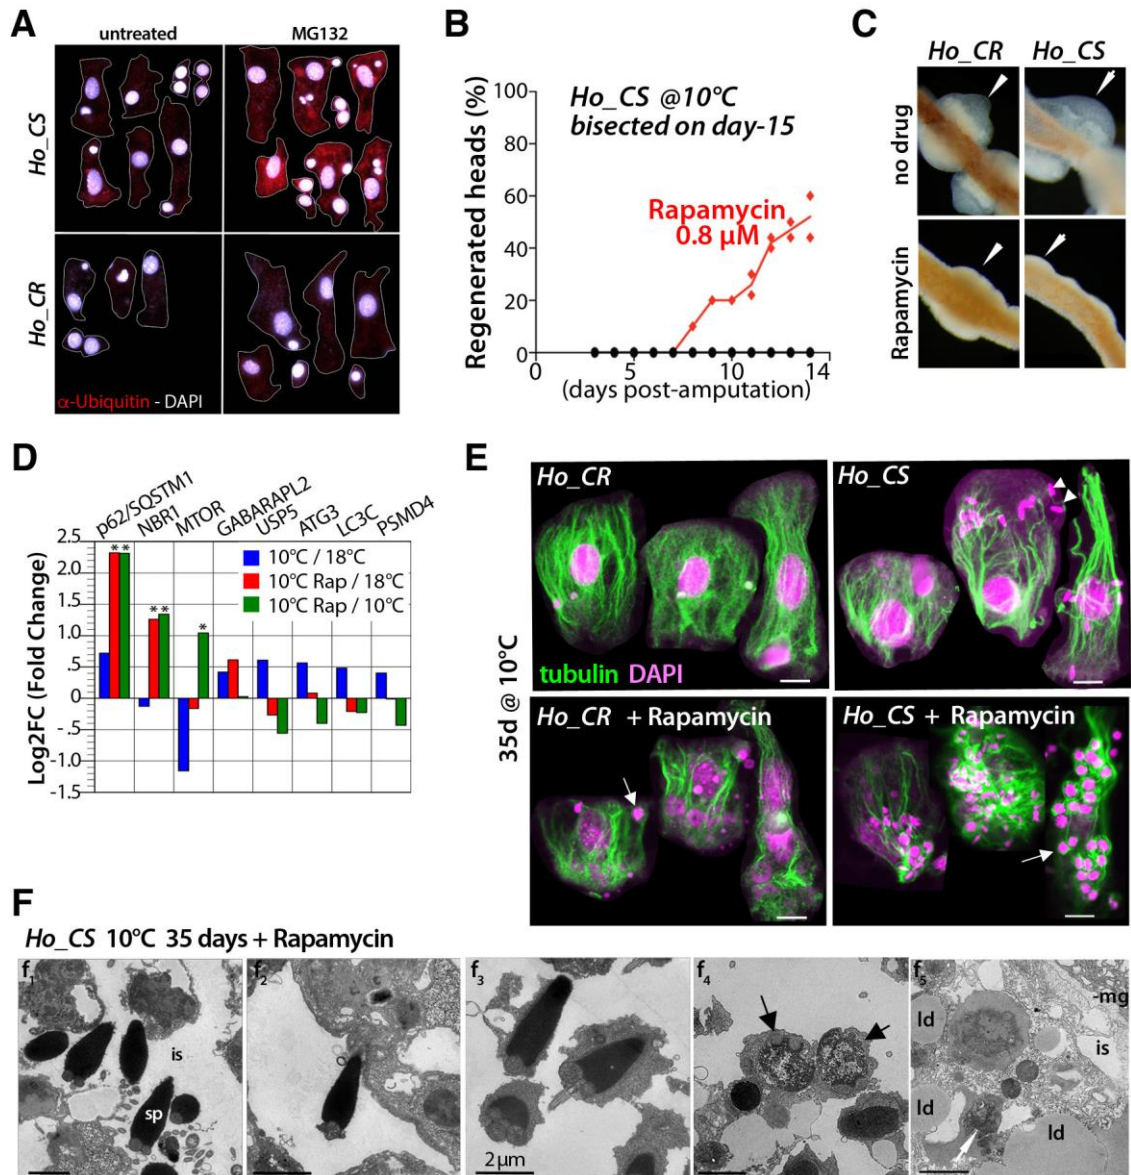

Figure S14: Anti-aging role of rapamycin in *Ho\_CS Hydra*

(A) Immunodetection of ubiquitin in cells from *Ho\_CS* and *Ho\_CR* animals maintained at 18°C and exposed or not to MG132 for 16 hours. (B) A continuous exposure to rapamycin from day-2 after transfer to 10°C efficiency rescues head regeneration in *Ho\_CS* bisected on day-15. (C) Testes (arrowheads) exhibit a reduced size in animals continuously exposed to rapamycin. (D) Proteomic analysis performed on *Ho\_CS* animals maintained for 35 days either at 18°C or at 10°C where they were exposed or not to rapamycin for 32 days, \*: 0.05, \*\*: 0.001 significance. (E) Engulfed cells detected with an anti α-tubulin antibody (green) and DAPI staining (pink) in epithelial cells from *Ho\_CS* and *Ho\_CR* animals fixed after 36 days at 10°C. Arrows: nuclei from immature germ cells; arrowheads: sperm cell nuclei. (F) Sperm cells (sp) engulfed in epithelial cells of rapamycin-treated *Ho\_CS* animals taken at 35 dpt. Sperm cells can be detected in the intracellular space (is, f<sub>1</sub>, f<sub>2</sub>), surrounded by cytoplasm (f<sub>3</sub>) and digested (f<sub>4</sub>, f<sub>5</sub>). Black arrows: mitochondria at the base of sperm cells. Abbreviations: is: intracellular space, ld: lipid droplet, mg: mesoglea. Scale bars = 2 μm.

WD40 repeat 1

```

WIPI2_HoCS -----MNLAANGADP-SGDLLFTNFDKT-----SLAVGTRLGYKLFLSNSV
WIPI2_HoCR -----MNLAANGADP-SGDLLFTNFDKT-----SLAVGTRLGYKLFLSNSV
WIPI2_Hydvu -----MNLAANGADP-SGDLLFTNFDKT-----SLAVGTRLGYKLFLSNSV
WIPI2_Nemve -----MNLAAYGGDP-TGNLLFVNFNDCT-----SLAICTGSKSGKYLSLGSV
WIPI2_Sacko -----MNLASHAGEA-NANLLFVNVNDCT-----SLAVGAKSGCRLFSLGSV
WIPI2_Capte -----MNLASQGGDP-NNDLIFVNFNDCS-----SLAVGSKHGYKFLSNSA
WIPI2_Apime MQNLVHNVDVLTQGLKYSISGLMNLANOTTDP-QSRVFFVNFNDCT-----SLAVGSKSGKYLFLSSV
WIPI2_Danre -----MNLASQSGEAGCSQLLFANFNDNT-----SLAVGTSKSGKYLFLSSSV
WIPI2_Human -----MNLASQSGEAGAGQLLFANFNDNTEVKGASRAALGRRAVVWSLAVGSKSGKYLFLSSSV

```

WD40 repeat 2      WD40 repeat 3      ATG16 binding

```

WIPI2_HoCS EKLDEIHH-YDKGDVCIVERLFSSSLVAIVSLSAPRRKLKVCHFKKGTEICNYSYPNTILAVRLNRVRLLVVLEESLYIHNIRD
WIPI2_HoCR EKLDEIHH-YDKGDVCIVERLFSSSLVAIVSLSAPRRKLKVCHFKKGTEICNYSYPNTILAVRLNRVRLLVVLEESLYIHNIRD
WIPI2_Hydvu EKLDEIHH-YDKGDVCIVERLFSSSLVAIVSLSAPRRKLKVCHFKKGTEICNYSYPNTILAVRLNRVRLLVVLEESLYIHNIRD
WIPI2_Nemve EKLEEIYEYGGTPDICIVERLFSSSLVAIVSLSAPRRKLKVCHFKKGTEICNYSYPNTILAVRLNRVRLLVVLEESLYIHNIRD
WIPI2_Sacko DKLEAIYEHNETEDICIVERLFSSSLVAIVSLSSPRRKLKVCHFKKGTEICNYSYPNTILAVRLNRLRIVALEESLYIHNIRD
WIPI2_Capte DKLENIYE-NDTEDICTVERLFSSSLVAIVGLSSPRRKLKVCHFKKGTEICNYSYSNTILAVRLNRLRIVCLEESLYIHNIRD
WIPI2_Apime DHLEKIYE-NDTEDIYIVERLFSSSLVAIVSLSSPRRKLKVCHFKKGTEICHYSYSNTILAVKLNRARLVVCLEESLYIHNIRD
WIPI2_Danre DKLEQIYECTDTEDVCIVERLFSSSLVAIVSLSKAPRRKLKVCHFKKGTEICNYSYSNTILAVKLNRQRLIVCLEESLYIHNIRD
WIPI2_Human DKLEQIYECTDTEDVCIVERLFSSSLVAIVSLSKAPRRKLKVCHFKKGTEICNYSYSNTILAVKLNRQRLIVCLEESLYIHNIRD

```

WD40 repeat 4      WD40 repeat 5

```

WIPI2_HoCS MKVLHTIRDTPPNRFGLCALSDNAENCYLAYPGNNRIGEVQIFDGINLRAVTLIAAHDAPLAAITFNIHATLLLATASEKGTVI
WIPI2_HoCR MKVLHTIRDTPPNRFGLCALSDNAENCYLAYPGNNRIGEVQIFDGINLRAVTLIAAHDAPLAAITFNIHATLLLATASEKGTVI
WIPI2_Hydvu MKVLHTIRDTPPNRFGLCALSDNAENCYLAYPGNNRIGEVQIFDGINLRAVTLIAAHDAPLAAITFNIHATLLLATASEKGTVI
WIPI2_Nemve MKVLHTIRDTPPNPSGLCALSVNSDNCYLAYPGSNOIGEVQIFDAVNLRAVTMIPAHDSPVASMAFNHMGTKLATASEKGTVI
WIPI2_Sacko MKVLHTIRDTPPNPIGLCALSINNDNCYLAYPGSSOIGEVQIFDSVNLRAVNMIPAHDSPLAALMFNPTATKLATASEKGTVI
WIPI2_Capte MKVLHTIRDTPPNPSGLCTLSNSNDNCYLAYPGSSOIGEVQIFDAVNLRAVTMIPAHDNPLAAMAFNSTGTRIATASEKGTVI
WIPI2_Apime MKVLHTIRDTPPNLAGLCTLSINSDNCYLAYPGSNTIGEVQIFDAINLQAKTMIPAHDSPLAALAFSPNGTKVATASEKGTVI
WIPI2_Danre MKVLHTIRETPPNPSGLCALSINSDNCYLAYPGSATIGEVQVFDTVNLRAANMIPAHDSPLAALAFDASGTKLATASEKGTVI
WIPI2_Human MKVLHTIRETPPNPAGLALSINSDNCYLAYPGSATIGEVQVFDTVNLRAANMIPAHDSPLAALAFDASGTKLATASEKGTVI

```

P13P binding      WD40 repeat 6

```

WIPI2_HoCS RVFSIPDGLKLFFRRGMKRCAQINSLAFSNDSLFVSSNTETVHVFKLETEKTS---KEEPSSQTWMGYFGKALMAPASYLP
WIPI2_HoCR RVFSIPDGLKLFFRRGMKRCAQINSLAFSNDSLFVSSNTETVHVFKLETEKTS---KEEPSSQTWMGYFGKALMAPASYLP
WIPI2_Hydvu RVFSIPDGLKLFFRRGMKRCAQINSLAFSNDSLFVSSNTETVHVFKLETEKTI---KEEPSSQTWMGYFGKALMAPASYLP
WIPI2_Nemve RVFSIPDGQKLYFRRGVKRCVTINSLAFSQDSLFSASSNTETVHIFKLEMPKD---KPQBESQGWMGYFGKAL---SPTNYLP
WIPI2_Sacko RVFSIPEGQKLFFRRGMKRCVSISSLAFSADSVLFSASSNTETVHIFKLETPRD---KPNEEPASMGYSKALMSSASYLP
WIPI2_Capte RVFSIPDGQKMFFRRGVKRCVTISYSLAFSPDSLFCSSNTETVHIFKLETVKDP---KVFEEPQWMGYFGQALKTSANYLP
WIPI2_Apime RVFHVHDGTKLFFFRRGVKRCVSISSLAFSVDSMFLCSSNTETVHIFKLEEPKEALRQTAESSQTWMGYLTKAVSANYLP
WIPI2_Danre RVFSIPEGQKLFFRRGVKRCVSICSLAFSMEGLFSASSNTETVHIFKLETQRE---KPQEEPTTWTGYFGKVLMASTTYLP
WIPI2_Human RVFSIPEGQKLFFRRGVKRCVSICSLAFSMDGMFLSASSNTETVHIFKLETVKE---KPPEEPTTWTGYFGKVLMASTSYLP

```

WD40 repeat 7

```

WIPI2_HoCS SQMTEVFSQRAFAIAKLPNAGQRNICALTVINKLPRILVASADGYLYIYNLDPTDGQECPILRQFSLIPSEDDVMNVPEGEN
WIPI2_HoCR SQMTEVFSQRAFAIAKLPNAGQRNICALTVINKLPRILVASADGYLYIYNLDPTDGQECPILRQFSLIPSEDDVMNVPEGEN
WIPI2_Hydvu SQMTEVFSQRAFAIAKLPNAGQRNICALAVINKLPRILVASADGYLYIYNLDPTDGQECPILRQFSLIPSEGDVMNVPEGEH
WIPI2_Nemve SQVTEVFNQRAFAIVHLPVAGLRNVCAVATIGKLPRLLVSADGYLYIYNLDPEDGCDCTLLKQHR-----
WIPI2_Sacko SQVTEVFNQRAFAIVKLPFAGLKNICALATIQKLPRVLVASQDGYLYIYNLDPAEGGDCTLLKQHRLIGMSCFVRETDKT-
WIPI2_Capte SQVTEMFNQRDFAIARLPFSGLRNVCTLNIQKLPRLLVASQNGYLYMYNLDPMEGGECTLLKQHRLDGQLDALTAEVSPPA
WIPI2_Apime SQVTEVFNQRAFAIVHLPFQGLNVCAITVVHKVLRLLVASAEGYLYVYNLDSTEGGCDCTLLKQHRLDGKRDEVDCASVSTA
WIPI2_Danre AHVTEMFTQRAFAIVRLPFSGHKNICALAIIQKIPRLLVAAADGYLYLYNLDPEGGDCTLLKQHRLDGSAEPANEILEQTA
WIPI2_Human SQVTEMFNQRAFAIVRLPFSGHKNICSLATIQKIPRLLVGAADGYLYMYNLDPEGGDCALMKQHRLDGSLETTNEILDSAS

```

WD40 repeat 8

```

WIPI2_HoCS YQAG---LAVSPSRHASS-----SA-----LSTSNEVE-----QNVKLSDD
WIPI2_HoCR YQAG---LAVSPSRHASS-----SA-----LSTSNEVE-----QNVKLSDD
WIPI2_Hydvu YQAG---LAVSSSRHASC-----SA-----LSTSNEIE-----QNVKISDD
WIPI2_Nemve -----
WIPI2_Sacko FTKP---GGPPTFAAAAA-----SGNRTEGTTERRNVVEDYTEGLDEGTCATADLLVAARENTPTQDMLKLDDD
WIPI2_Capte FTEPAAAAAAPPFGKTSEEGAGKGRTTEEVRKQSGNYSYASALKQAEQRAGAFFDDEPEIEVQDDPSEVTPPQLEALRLDDE
WIPI2_Apime GLGS---GEPPSCTTVQI-----V-----QNTSEKYHEMIAATESPPFGSGSFRLKDD
WIPI2_Danre HDRP---LVAQTYSAAVA-----KG-----YS-----EDQCAVGGAGVEDDM-----NTLHLDEE
WIPI2_Human HDCP---LVTQTYGAAAG-----KGTVYVSSPTRLAYT-----DDLGAVGGACLEDEA-----SALRLDEE

```

WD40 repeat 9

```

WIPI2_HoCS NEFPPLTLRNE
WIPI2_HoCR NEFPPLTLRNE
WIPI2_Hydvu NEFPPLTLRNE
WIPI2_Nemve -----
WIPI2_Sacko NEFPPMTHDVP
WIPI2_Capte NEFPPMTHKTD
WIPI2_Apime AEFPPVTQRTD
WIPI2_Danre NEQPPLILETD
WIPI2_Human SEHPPMILRTD

```

Figure S15: Alignment of vertebrate and non-vertebrate WIPI2 protein sequences

The alignment was obtained on MUSCLE ([www.ebi.ac.uk/Tools/msa/muscle/](http://www.ebi.ac.uk/Tools/msa/muscle/)) and manually corrected to align the functional domains and the WD repeats. Accession numbers of the *Hydra* WIPI2 sequences are given in **Figure S16A**.



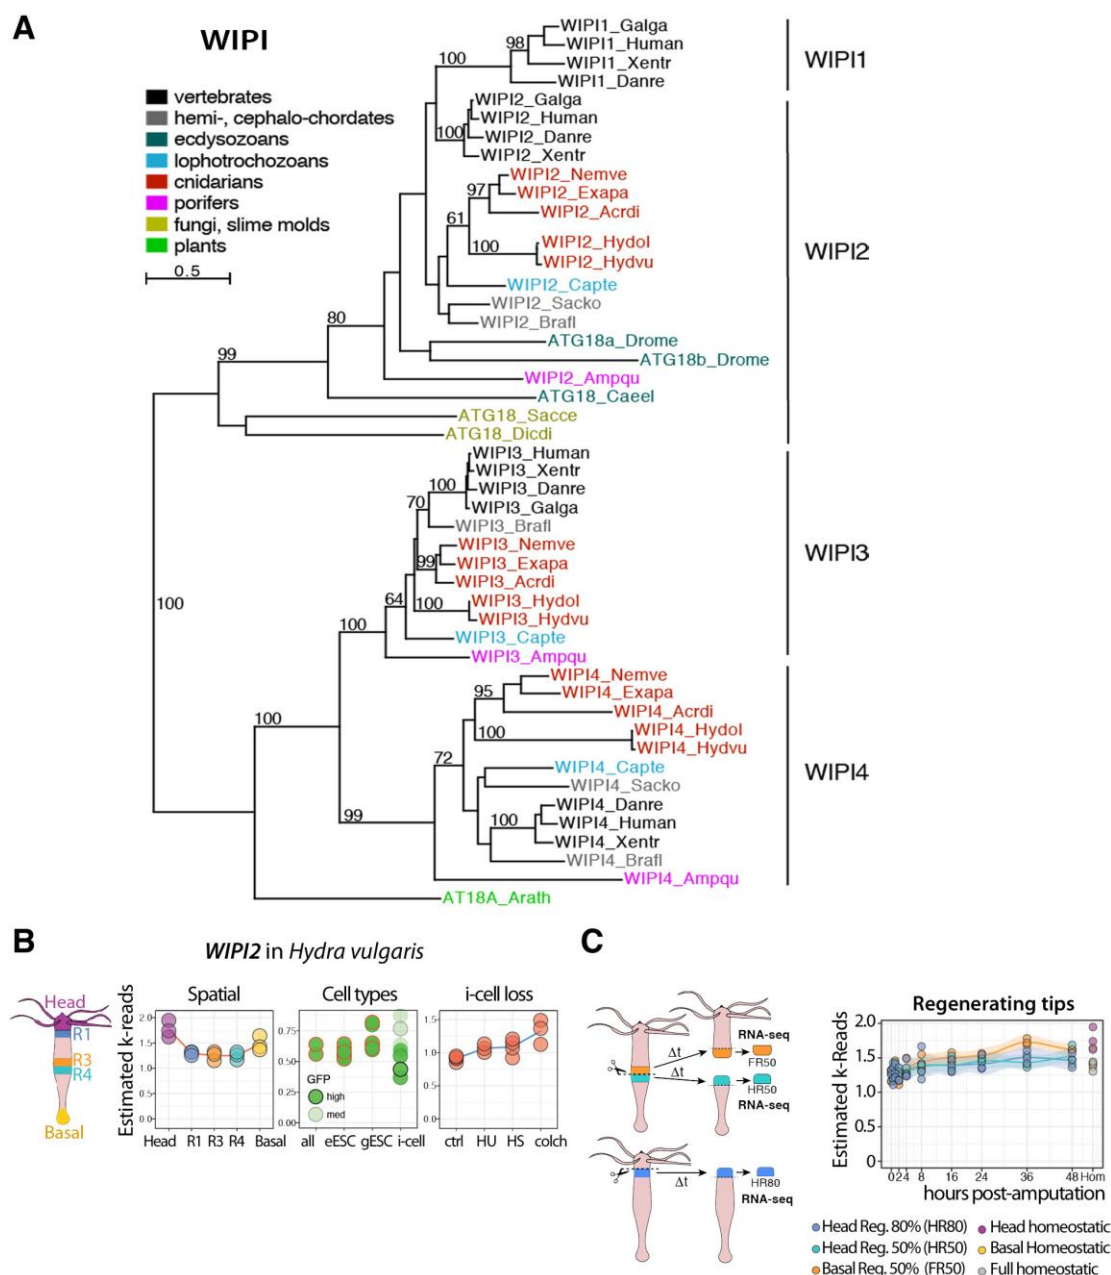Figure S16: Phylogenetic and expression analysis of *WIPI2* in *Hydra*

(A) Phylogenetic tree of WIPI protein sequences aligned with MUSCLE and built with PhyML 3.0, tested with 100 bootstraps. Species code and sequence accession numbers: *Acrdi*: *Acropora digitifera* (coral, XP\_015776989.1, XP\_015752246.1, XP\_015760656.1); *Ampqu*: *Amphimedon queenslandica* (XP\_019853755.1, XP\_003388703.1, XP\_019850615.1); *Arath*: *Arabidopsis thaliana* (Q93VB2); *Brafl*: *Branchiostoma floridae* (XP\_002599262.1, XP\_002595393.1); *Capte*: *Capitella teleta* (ELT96465.1, ELU11552.1, ELT94793.1); *Danre*: *Danio rerio* (NP\_956685.1, XP\_005164182.1, Q7ZUW6, Q7ZUX3); *Dicdi*: *Dictyostelium discoideum* (Q54NA2); *Exapa*: *Exaiptasia pallida* (XP\_020916524.1, XP\_020900004.1, XP\_020906575.1); *Galga*: *Gallus gallus* (XP\_015135440.1, NP\_001006162.1, Q5ZL16); *Human* (Q5MNZ9, Q9Y4P8, Q5MNZ6, Q9Y484); *Hydvu*: *Hydra vulgaris* (T2M354, T2M370, XP\_012563670.1, XP\_002163439.1); *Hydol* (*Ho\_CS*: S022900c0g1, S037678c0g1, S028416c0g1; *Ho\_CR*: R024157c0g1); *Nemve*: *Nematostella vectensis* (XP\_001630626.1, XP\_001626838.1, XP\_001635768.1); *Sacce*: *Saccharomyces cerevisiae* (P43601); *Sacko*: *Saccoglossus kowalevskii* (XP\_002739331.1, XP\_006822202.1); *Xenla*: *Xenopus laevis* (Q6DCV0); *Xentr*: *Xenopus tropicalis* (NP\_989387.1, XP\_002941343.2, Q640T2). (B, C) RNA-seq profiles of *H. vulgaris* *WIPI2* as reported in (Wenger et al., 2014, Wenger et al., 2016, Wenger et al., 2019). **Body position**: expression measured at 5 distinct levels along the body axis of *H. vulgaris* Jussy strain; **Stem cell types**: expression measured in the three stem cell populations of *H. vulgaris* AEP (after FACS sorting cells of transgenic strains that constitutively GFP in one or the other cell type); **i-cell loss**: expression measured 10 days after the heat-shock or drug-induced elimination of cycling interstitial cells; **regeneration**: expression measured in regenerating tips at 9 time points of three distinct regenerative processes in *H. vulgaris* Jussy strain (HR50, FR50: head or foot regeneration after mid-gastric bisection; HR80: head regeneration after decapitation).

## SUPPLEMENTARY TABLES

| Interstitial lineage genes | Full protein name                             | UniProt AC / RefSeq <i>Hv</i>  | <i>Ho_CR</i> transcript id | <i>Ho_CS</i> transcript id |
|----------------------------|-----------------------------------------------|--------------------------------|----------------------------|----------------------------|
| <i>CnASH</i>               | Cnidarian achaete-scute homolog               | <a href="#">Q25179</a>         | R025980c0g2_i01            | S016491c0g1_i01            |
| <i>Cnnos1</i>              | Cnidarian nanos-homolog 1                     | <a href="#">Q9NDP0</a>         | R036747c0g1_i01            | S031114c0g1_i01            |
| <i>Cnnos2</i>              | Cnidarian nanos-homolog 2                     | <a href="#">Q9NDN9</a>         | R033870c0g1_i01            | S025194c0g1_i01            |
| <i>cnox-2</i>              | Cnox-2 homeoprotein                           | <a href="#">Q9NFM1</a>         | R023828c0g2_i01            | S016662c0g1_i01            |
| <i>COUP-TF1</i>            | COUP-TF1 nuclear orphan receptor              | <a href="#">Q66M18</a>         | R038175c0g3_i01            | S036363c0g2_i02            |
| <i>foxN1</i>               | Forkhead box protein N1                       | <a href="#">T2MID9</a>         | R036487c0g1_i02            | S040839c0g1_i02            |
| <i>foxO</i>                | FoxO transcription factor                     | <a href="#">J7HWF0</a>         | R038309c1g1_i02            | S042977c0g1_i07            |
| <i>Hyzic</i>               | Zn-finger transcription factor 1              | <a href="#">Q6T520</a>         | R067356c0g1_i01            | S015485c0g1_i01            |
| <i>Kazal-1</i>             | Kazal-type serine protease inhibitor 1        | <a href="#">Q1XEF1</a>         | R040495c0g3_i05            | S040076c1g2_i07            |
| <i>myc1</i>                | C-Myc-binding protein 1                       | <a href="#">D0EM49</a>         | R028868c0g1_i01            | S034530c0g2_i01            |
| <i>Notch4</i>              | neurogenic locus notch homolog protein like 4 | <a href="#">XP_012557050.1</a> | R036182c1g1_i01            | S041501c1g1_i01            |
| <i>NOWA</i>                | Nematocyst outer wall antigen                 | <a href="#">Q8TF70</a>         | R038006c0g1_i01            | S038314c1g1_i01            |
| <i>Pax-A</i>               | Paired-box homeoprotein A                     | <a href="#">Q02015</a>         | R031053c1g1_i01            | S036858c0g5_i01            |
| <i>POU4F2</i>              | POU domain protein                            | <a href="#">T2MDR7</a>         | R026985c0g2_i02            | S024242c0g1_i01            |
| <i>prdl-b</i>              | Paired-like homeoprotein b                    | <a href="#">O62546</a>         | R031740c0g1_i01            | S030596c0g1_i01            |
| <i>Pumilio</i>             | Pumilio domain-containing protein KIAA0020    | <a href="#">T2MDF1</a>         | R039094c0g1_i02            | S040698c0g1_i01            |
| <i>RFamide-A</i>           | Neuropeptide RFamide A                        | <a href="#">O76948</a>         | R035154c0g1_i01            | S036815c0g1_i01            |
| <i>CnVas1</i>              | Vasa-related protein CnVAS1                   | <a href="#">Q9GV13</a>         | R025460c0g1_i01            | S033134c0g2_i01            |
| <i>CnVas2</i>              | Vasa-related protein CnVAS2                   | <a href="#">Q9GV12</a>         | R033160c0g1_i01            | S042823c1g1_i02            |
| <i>ZNF845</i>              | Transcription factor ZNF845                   | <a href="#">I3V7W9</a>         | R003173c0g2_i01            | S037612c0g1_i01            |

Table S1: Sequence Accession Numbers of 20 *H. vulgaris* (*Hv*) and *H. oligactis* (*Ho\_CS*, *Ho\_CR*) genes involved in proliferation and/or differentiation of interstitial cell (i-cell) lineages.

For the cold-induced RNA-seq profiles in *Ho\_CS* and *Ho\_CR*, see **supplemental Figure-S2**. For the spatial, cell-type, i-cell loss and regeneration RNA-seq profiles of the corresponding transcripts in *H. vulgaris*, see on HydrATLAS: <https://HydrATLAS.unige.ch> (Wenger et al., 2019).

| Cell cycle orthologs | Full protein name                                          | UniProt AC / RefSeq <i>Hv</i> | <i>Ho_CR</i> transcript id | <i>Ho_CS</i> transcript id |
|----------------------|------------------------------------------------------------|-------------------------------|----------------------------|----------------------------|
| <i>AURKA</i>         | Aurora kinase A                                            | <a href="#">T2MJ8</a>         | R027511c0g1_i04            | S041489c3g2_i03            |
| <i>C12orf11</i>      | Cell cycle regulator Mat89Bb homolog                       | <a href="#">T2M413</a>        | R038671c0g1_i02            | S041657c1g1_i02            |
| <i>CABLES1</i>       | CDK5 and ABL1 enzyme substrate 1                           | <a href="#">T2M990</a>        | R029958c0g1_i01            | S029735c0g1_i01            |
| <i>CBP</i>           | CREB-binding protein                                       | <a href="#">E9AI12</a>        | R039021c0g1_i04            | S039796c0g2_i01            |
| <i>CCNA</i>          | mitotic-specific cyclin-A                                  | <a href="#">P51986</a>        | R038551c0g1_i03            | S039058c0g3_i03            |
| <i>CCNB</i>          | mitotic-specific cyclin-B                                  | <a href="#">P51987</a>        | R038974c1g1_i01            | S042648c3g5_i03            |
| <i>CCNB3</i>         | mitotic-specific cyclin-B3                                 | <a href="#">T2M7Z1</a>        | R024808c0g2_i01            | S036219c0g1_i01            |
| <i>CCND2</i>         | G1/S-specific cyclin-D2                                    | <a href="#">T2MGB1</a>        | R031658c0g1_i05            | S035897c0g1_i01            |
| <i>CCNF</i>          | Cyclin-F                                                   | <a href="#">T2M6V5</a>        | R033334c0g1_i01            | S033757c0g1_i01            |
| <i>CDC123</i>        | Cell division cycle protein 123 homolog                    | <a href="#">T2MHK2</a>        | R038855c0g1_i05            | S043547c1g1_i01            |
| <i>CDC16</i>         | Cell division cycle protein 16 homolog                     | <a href="#">T2MDN5</a>        | R021851c0g1_i01            | S021110c0g1_i01            |
| <i>CDC20</i>         | Cell division cycle protein 20 homolog                     | <a href="#">T2MEB9</a>        | R032120c0g1_i02            | S036535c0g1_i02            |
| <i>CDC23</i>         | Cell division cycle protein 23 homolog                     | <a href="#">T2M3J4</a>        | R036686c0g1_i04            | S036439c0g1_i02            |
| <i>CDC27</i>         | Cell division cycle protein 27 homolog                     | <a href="#">T2MGT8</a>        | R035608c0g1_i01            | S036141c0g1_i01            |
| <i>CDC42</i>         | Cell division control protein 42 homolog                   | <a href="#">T2MEG1</a>        | R038235c0g1_i01            | S033376c0g1_i01            |
| <i>CDC45</i>         | Cell division control protein 45 homolog                   | <a href="#">T2MHN2</a>        | R039382c0g1_i02            | S039367c0g6_i01            |
| <i>CDC5L</i>         | Cell division cycle 5-like protein                         | <a href="#">T2M796</a>        | R026217c0g1_i03            | S038652c0g1_i03            |
| <i>CDC6</i>          | Cell division control protein 6 homolog                    | <a href="#">T2M680</a>        | R037857c0g1_i01            | S030092c0g1_i01            |
| <i>CDC7</i>          | Cell division cycle 7-related protein kinase               | <a href="#">T2MIW7</a>        | R027651c0g1_i02            | S035902c0g1_i01            |
| <i>CDCA7L</i>        | Cell division cycle-associated 7-like protein              | <a href="#">T2M7K7</a>        | R030222c0g1_i01            | S033291c0g1_i01            |
| <i>DIAPH2</i>        | Protein diaphanous homolog 2                               | <a href="#">T2MIT5</a>        | R037202c0g1_i01            | S041348c0g1_i01            |
| <i>DOT1L</i>         | Histone-lysine N-methyltransferase, H3 lysine-79 specific  | <a href="#">T2M8S1</a>        | R033812c0g1_i01            | S037123c0g1_i01            |
| <i>E2F4</i>          | Transcription factor E2F4                                  | <a href="#">T2MCU6</a>        | R029967c0g1_i01            | S008670c0g2_i01            |
| <i>FGFR</i>          | Fibroblast growth factor receptor                          | <a href="#">Q86PM4</a>        | R033445c0g1_i01            | S034028c0g1_i01            |
| <i>FNTB</i>          | Protein farnesyltransferase subunit beta                   | <a href="#">T2MFI9</a>        | R007519c0g1_i01            | S003373c0g1_i01            |
| <i>GAS2L1</i>        | GAS2-like protein 1                                        | <a href="#">T2M790</a>        | R033006c0g2_i01            | S034987c0g1_i01            |
| <i>HUS1</i>          | Checkpoint protein HUS1                                    | <a href="#">T2MIV2</a>        | R011216c0g1_i01            | S029062c1g1_i04            |
| <i>ING4</i>          | Inhibitor of growth protein                                | <a href="#">T2M3P3</a>        | R035845c0g1_i01            | S001006c0g1_i01            |
| <i>KATNA1</i>        | Katanin p60 ATPase-containing subunit A1                   | <a href="#">T2MHM7</a>        | R033726c0g1_i01            | S035284c0g1_i02            |
| <i>LIN52</i>         | Protein lin-52 homolog                                     | <a href="#">T2MBY0</a>        | R015400c0g2_i01            | S024491c0g1_i01            |
| <i>LIN9</i>          | Protein lin-9 homolog                                      | <a href="#">T2MBY8</a>        | R032851c0g1_i01            | S027133c0g1_i01            |
| <i>MFN2</i>          | Mitofusin-2                                                | <a href="#">T2MHD7</a>        | R038385c0g1_i01            | S030617c0g1_i01            |
| <i>MII1</i>          | Migration and invasion-inhibitory protein                  | <a href="#">T2MC10</a>        | R033074c0g2_i01            | S037583c1g1_i01            |
| <i>MNAT1</i>         | CDK-activating kinase assembly factor MAT1                 | <a href="#">T2MF88</a>        | R035361c2g1_i01            | S042834c3g1_i02            |
| <i>MRE11A</i>        | Double-strand break repair protein MRE11A                  | <a href="#">T2MZF1</a>        | R037286c0g1_i01            | S039847c0g1_i02            |
| <i>NPDC1</i>         | Neural proliferation differentiation and control protein 1 | <a href="#">T2M4U6</a>        | R031720c0g1_i01            | S038708c0g1_i01            |
| <i>PA2G4</i>         | Proliferation-associated protein 2G4                       | <a href="#">T2M2R0</a>        | R038317c0g1_i01            | S041220c0g1_i01            |
| <i>PAFAH1B1</i>      | Lissencephaly-1 homolog                                    | <a href="#">T2MFT1</a>        | R036160c0g1_i01            | S039362c0g1_i02            |
| <i>PLK1</i>          | Serine/threonine-protein kinase PLK1                       | <a href="#">T2MFR1</a>        | R038084c0g2_i01            | S038822c0g1_i01            |
| <i>PLK4</i>          | Serine/threonine-protein kinase PLK4                       | <a href="#">T2MJ85</a>        | R031836c0g1_i01            | S034548c0g2_i02            |
| <i>RAD1</i>          | Cell cycle checkpoint protein RAD1                         | <a href="#">T2MID6</a>        | R031826c0g1_i01            | S036513c0g3_i02            |
| <i>RAD17</i>         | Cell cycle checkpoint protein RAD17                        | <a href="#">T2MIH3</a>        | R040845c0g1_i01            | S041741c2g1_i01            |
| <i>RAD9A</i>         | Cell cycle checkpoint control protein RAD9A                | <a href="#">T2M799</a>        | R040444c0g1_i02            | S040626c0g1_i01            |
| <i>RSK</i>           | Ribosomal protein S6 kinase                                | <a href="#">E9AI11</a>        | R023522c0g2_i01            | S008723c0g1_i01            |
| <i>SAV1</i>          | Protein salvador homolog 1                                 | <a href="#">T2M622</a>        | R038127c0g1_i01            | S040596c0g1_i02            |
| <i>SEPT2</i>         | Septin-2                                                   | <a href="#">T2MD65</a>        | R035337c0g1_i01            | S039793c0g2_i01            |
| <i>SIPAIL3</i>       | Signal-induced proliferation-associated 1-like protein 3   | <a href="#">T2MIG6</a>        | R036824c0g2_i01            | S042925c0g3_i05            |
| <i>TFDP1</i>         | Transcription factor Dp-1                                  | <a href="#">T2MDH4</a>        | R001653c0g1_i01            | S030116c0g1_i02            |
| <i>TMEM30A</i>       | Cell cycle control protein 50A                             | <a href="#">T2M525</a>        | R031410c0g1_i01            | S038468c1g1_i01            |
| <i>TTC28</i>         | Tetratricopeptide repeat protein 28                        | <a href="#">T2M8B7</a>        | R038479c0g1_i04            | S041972c0g1_i02            |
| <i>TTK</i>           | Dual specificity protein kinase TTK                        | <a href="#">T2MG79</a>        | R008001c0g1_i01            | S028488c0g1_i01            |
| <i>USPL1</i>         | Ubiquitin-specific peptidase-like protein 1                | <a href="#">T2MBR4</a>        | R036743c0g1_i02            | S040029c0g1_i06            |

Table S2: Sequence Accession Numbers of 52 *H. vulgaris* (*Hv*) and *H. oligactis* (*Ho\_CS*, *Ho\_CR*) orthologs to mammalian genes involved in cell cycle and cell proliferation.

For the comparative analysis of the expression of these genes after transfer to cold in *Ho\_CS* and *Ho\_CR*, see **Figure S3** and **Figure S4**. For the spatial, cell-type, i-cell loss and regeneration RNA-seq profiles of the corresponding transcripts in *H. vulgaris*, see on HydrATLAS: <https://HydrATLAS.unige.ch> (Wenger et al., 2019).

| Autophagy orthologs   | Full protein name                                             | Hv UniProt / RefSeq            | Ho_CR transcript id | Ho_CS transcript id |
|-----------------------|---------------------------------------------------------------|--------------------------------|---------------------|---------------------|
| <b>AMBRA1</b>         | Activating molecule in BECN1-regulated autophagy protein 1    | <a href="#">T2M6D7</a>         | R033532c0g1_i01     | S034160c0g2_i01     |
| <b>ATG10</b>          | Ubiquitin-like-conjugating enzyme ATG10                       | <a href="#">T2M5V2</a>         | R030322c0g1_i01     | S032762c0g1_i01     |
| <b>ATG101</b>         | Autophagy-related protein 101                                 | <a href="#">T2M6Y4</a>         | R055757c0g1_i01     | S071050c0g1_i01     |
| <b>ATG12</b>          | Ubiquitin-like protein ATG12                                  | <a href="#">T2MIE8</a>         | R029364c0g1_i01     | S036036c1g1_i01     |
| <b>ATG13</b>          | Autophagy-related protein 13                                  | <a href="#">T2MI85</a>         | R029409c0g1_i01     | S043484c2g1_i01     |
| <b>ATG14</b>          | Beclin 1-associated autophagy-related key regulator           | <a href="#">T2MBM0</a>         | R036673c0g1_i04     | S028223c0g2_i02     |
| <b>ATG16L1</b>        | Autophagy-related protein 16-1                                | <a href="#">T2MC97</a>         | R036776c1g1_i01     | S036117c0g1_i02     |
| <b>ATG2B</b>          | Autophagy-related protein 2 homolog                           | <a href="#">T2M8E3</a>         | R026665c0g1_i01     | S042169c0g1_i01     |
| <b>ATG3</b>           | Autophagy-related protein 3                                   | <a href="#">T2M4W2</a>         | R035592c1g1_i05     | S040217c0g1_i08     |
| <b>ATG4B</b>          | Cysteine protease ATG4B                                       | <a href="#">T2M2V7</a>         | R038184c0g1_i02     | S037421c1g1_i01     |
| <b>ATG4C</b>          | Cysteine protease ATG4C                                       | <a href="#">T2M7B1</a>         | R037362c0g1_i03     | S043278c1g1_i01     |
| <b>ATG5</b>           | Autophagy protein 5                                           | <a href="#">T2M5L4</a>         | R021841c0g2_i01     | S030832c0g1_i01     |
| <b>ATG7</b>           | Ubiquitin-like modifier-activating enzyme ATG7                | <a href="#">T2MHR4</a>         | R036000c4g1_i02     | S040163c0g1_i04     |
| <b>ATG9A</b>          | Autophagy-related protein 9A                                  | <a href="#">T2MBB7</a>         | R032526c0g4_i04     | S041696c3g4_i01     |
| <b>BECN1</b>          | Beclin1                                                       | <a href="#">T2MDF4</a>         | R040450c1g2_i06     | S043504c0g1_i03     |
| <b>CALR</b>           | Calreticulin                                                  | <a href="#">T2MFF9</a>         | R015676c0g2_i01     | S028677c1g1_i01     |
| <b>CBL</b>            | E3 ubiquitin-protein ligase CBL                               | <a href="#">T2MG42</a>         | R038366c0g1_i02     | S034365c0g1_i01     |
| <b>CDK2</b>           | Cyclin-dependent kinase 2                                     | <a href="#">T2MG16</a>         | R026975c0g1_i01     | S026262c0g1_i01     |
| <b>CLTC</b>           | Clathrin heavy chain                                          | <a href="#">T2MENS5</a>        | R038444c0g1_i01     | S039376c0g1_i02     |
| <b>CTNNB1</b>         | b-catenin                                                     | <a href="#">T2MGP6</a>         | R031422c0g1_i01     | S035025c0g1_i01     |
| <b>DAPK1/MYLK1</b>    | Myosin light chain kinase                                     | <a href="#">XP_012566973.1</a> | R040005c0g1_i01     | S042661c1g1_i01     |
| <b>DAPK2</b>          | Death-associated protein kinase 2                             | <a href="#">T2M3L1</a>         | R037170c1g1_i01     | S035730c0g1_i04     |
| <b>DRAM1</b>          | DNA damage-regulated autophagy modulator protein 1            | <a href="#">T2M9Y1</a>         | R010350c0g1_i01     | S017218c0g1_i01     |
| <b>DRAM2</b>          | DNA damage-regulated autophagy modulator protein 2            | <a href="#">T2MB87</a>         | R029953c0g1_i01     | S037063c0g1_i02     |
| <b>DVL3</b>           | Dishevelled-like                                              | <a href="#">Q9GTJ8</a>         | R035715c0g1_i01     | S028887c0g3_i01     |
| <b>EPG5</b>           | Ectopic P granules protein 5 homolog                          | <a href="#">T2M4L4</a>         | R033380c0g1_i03     | S041881c0g1_i01     |
| <b>FUNDC2</b>         | FUN14 domain-containing protein 2                             | <a href="#">T2M6E3</a>         | R034657c0g1_i01     | S040426c0g1_i01     |
| <b>GABARAP</b>        | Gamma-aminobutyric acid receptor-associated protein           | <a href="#">T2MID2</a>         | R034299c0g1_i01     | S041977c0g1_i01     |
| <b>GABARAPL2</b>      | Gamma-aminobutyric acid receptor-associated protein like 2    | <a href="#">T2MFA6</a>         | R040572c3g1_i01     | S042989c1g3_i05     |
| <b>GOPC</b>           | Golgi-associated PDZ and coiled-coil motif-containing protein | <a href="#">T2M5L1</a>         | R025782c0g1_i01     | S021196c0g1_i01     |
| <b>LAMP1</b>          | Lysosome-associated membrane glycoprotein 1                   | <a href="#">T2MGK4</a>         | R034674c0g2_i01     | S037683c2g1_i01     |
| <b>LC3A/B</b>         | Microtubule-associated proteins 1A/1B light chain 3A          | <a href="#">XP_012555909.1</a> | R033468c0g1_i01     | S043022c1g3_i01     |
| <b>LC3C</b>           | Microtubule-associated proteins 1A/1B light chain 3C          | <a href="#">T2M644</a>         | R036327c0g1_i01     | S040689c0g1_i01     |
| <b>MAPK15</b>         | Mitogen-activated protein kinase                              | <a href="#">T2M8C8</a>         | R032105c0g1_i01     | S035992c0g1_i02     |
| <b>MFN2</b>           | Mitofusin                                                     | <a href="#">T2MHD7</a>         | R038385c0g1_i01     | S030617c0g1_i01     |
| <b>mTOR</b>           | S/T protein kinase Target of Rapamycin                        | <a href="#">T2MFU7</a>         | R038760c0g1_i01     | S039716c0g1_i01     |
| <b>MYH10</b>          | Myosin-10                                                     | <a href="#">T2MG36</a>         | R041168c0g3_i01     | S043809c0g1_i03     |
| <b>NBR1</b>           | Next to BRCA1 gene 1 protein                                  | <a href="#">XP_002169141.3</a> | R036941c0g1_i01     | S037290c0g1_i02     |
| <b>OPTN</b>           | Optineurin                                                    | <a href="#">T2M7C5</a>         | R030608c0g1_i01     | S040493c0g1_i01     |
| <b>P62/SQSTM1</b>     | Sequestosome-1                                                | <a href="#">T2MDZ6</a>         | R040075c0g1_i01     | S041284c0g1_i03     |
| <b>PASK</b>           | PAS domain-containing serine/threonine-protein kinase         | <a href="#">T2M7I6</a>         | R035698c0g1_i02     | S035923c0g3_i01     |
| <b>PIK3R4 (VPS15)</b> | Phosphoinositide 3-kinase regulatory subunit 4                | <a href="#">T2M6A2</a>         | R032824c0g1_i01     | S033802c0g1_i01     |
| <b>PIK3C3 (VPS34)</b> | Phosphatidylinositol 3-kinase catalytic subunit type 3        | <a href="#">T2M8P5</a>         | R028513c0g2_i01     | S037049c0g1_i01     |
| <b>PLEKHF2</b>        | Pleckstrin homology domain-containing family F member 2       | <a href="#">T2M5S9</a>         | R038718c0g1_i02     | S041724c0g1_i01     |
| <b>PRKAA2</b>         | 5'-AMP-activated protein kinase catalytic subunit alpha-2     | <a href="#">T2MFI8</a>         | R036403c0g1_i02     | S039556c0g1_i01     |
| <b>PRKG2</b>          | 5'-AMP-activated protein kinase subunit gamma-2               | <a href="#">T2M3A1</a>         | R037932c0g1_i02     | S042780c0g5_i04     |
| <b>PSMD4</b>          | 26S proteasome non-ATPase regulatory subunit 4                | <a href="#">T2MFE9</a>         | R032102c0g1_i01     | S038651c0g3_i01     |
| <b>RAB24</b>          | Ras-related protein Rab-24                                    | <a href="#">T2M8J9</a>         | R033692c0g2_i01     | S043114c1g3_i01     |
| <b>RB1CC1</b>         | RB1-inducible coiled-coil protein 1                           | <a href="#">T2M8Y6</a>         | R040512c0g1_i04     | S040101c0g1_i01     |
| <b>RUBCN</b>          | Run domain Beclin-1-interacting Cys-rich domain-cont. protein | <a href="#">T2M8H1</a>         | R033800c0g1_i02     | S036891c0g1_i01     |
| <b>SCOC</b>           | Short coiled-coil protein                                     | <a href="#">T2M358</a>         | R027960c0g1_i01     | S031987c0g1_i01     |
| <b>SESN1-2</b>        | Sestrin-1                                                     | <a href="#">T2M1Y1</a>         | R034652c0g1_i01     | S030353c0g1_i01     |
| <b>SH3GLB1</b>        | Endophilin-B1                                                 | <a href="#">T2M3B1</a>         | R022339c0g1_i02     | S031988c0g1_i03     |
| <b>STK11</b>          | Serine/threonine-protein kinase 11                            | <a href="#">T2MDA0</a>         | R028673c0g1_i01     | S030765c0g1_i01     |
| <b>STX17</b>          | Syntaxin-17                                                   | <a href="#">T2MEJ3</a>         | R038040c0g1_i05     | S040560c0g1_i01     |
| <b>TBC1D14</b>        | TBC1 domain family member 14                                  | <a href="#">T2M3G3</a>         | R035499c0g1_i01     | S042386c0g3_i01     |
| <b>TBC1D25</b>        | TBC1 domain family member 25                                  | <a href="#">T2MCX7</a>         | R024677c0g1_i03     | S037186c0g1_i04     |
| <b>TBC1D5</b>         | TBC1 domain family member 5                                   | <a href="#">T2M8P8</a>         | R001078c0g2_i01     | S027212c0g1_i01     |
| <b>TFEB (MITF)</b>    | Transcription factor EB                                       | <a href="#">T2MHT1</a>         | R032064c0g1_i03     | S029890c0g1_i01     |
| <b>TMEM192</b>        | Transmembrane protein 192                                     | <a href="#">T2MAC7</a>         | R025234c0g1_i04     | S029317c0g1_i01     |
| <b>TOLLIP</b>         | Toll-interacting protein                                      | <a href="#">T2M581</a>         | R032916c0g1_i01     | S064218c0g1_i01     |
| <b>TP53INP1</b>       | Tumor protein p53-inducible nuclear protein 1                 | <a href="#">XP_012566192.1</a> | R036441c0g1_i01     | S042256c0g3_i01     |
| <b>ULK1/2</b>         | Serine/threonine-protein kinase ULK1/2                        | <a href="#">XP_002167716.3</a> | R034566c0g1_i03     | S032016c0g3_i01     |
| <b>ULK3</b>           | Serine/threonine-protein kinase ULK3                          | <a href="#">T2MBQ7</a>         | R023417c0g1_i01     | S030594c0g1_i01     |
| <b>ULK4</b>           | Serine/threonine-protein kinase ULK4                          | <a href="#">T2M8D5</a>         | R038809c0g1_i01     | S035052c0g2_i01     |
| <b>USP5</b>           | Ubiquitin carboxyl-terminal hydrolase 5                       | <a href="#">T2MFO7</a>         | R035151c0g1_i02     | S036059c0g1_i03     |
| <b>UVRAG</b>          | UV radiation resistance-associated gene protein               | <a href="#">T2M3F0</a>         | R011659c0g1_i01     | S031929c0g1_i02     |
| <b>VAMP3</b>          | Vesicle-associated membrane protein 3                         | <a href="#">T2MCV8</a>         | not found           | not found           |
| <b>VAMP4</b>          | Vesicle-associated membrane protein 4                         | <a href="#">T2MI55</a>         | R007986c0g1_i01     | S030362c0g1_i01     |
| <b>VAMP7</b>          | Vesicle-associated membrane protein 7                         | <a href="#">T2MF92</a>         | R033884c0g3_i01     | S021726c0g1_i01     |
| <b>VAPB</b>           | Vesicle-associated membrane protein-associated protein B/C    | <a href="#">T2MI95</a>         | R039749c0g1_i02     | S037148c1g2_i01     |
| <b>VMP1</b>           | Vacuole membrane protein 1                                    | <a href="#">T2M837</a>         | R031782c0g1_i01     | S033370c0g1_i04     |
| <b>VPS13A</b>         | Vacuolar protein sorting-associated protein 13A               | <a href="#">T2M7E9</a>         | R036423c0g1_i01     | S039033c0g1_i01     |
| <b>VPS53</b>          | Vacuolar protein sorting-associated protein 53                | <a href="#">T2MBJ0</a>         | R032923c0g1_i05     | S035892c0g2_i03     |
| <b>WIP1</b>           | WD repeat domain phosphoinositide-interacting protein 2       | <a href="#">T2M354</a>         | R024157c0g1_i01     | S022900c0g1_i02     |
| <b>ZFYVE1</b>         | Zinc finger FYVE domain-containing protein 1                  | <a href="#">T2M5M0</a>         | R008385c0g2_i01     | S030332c0g1_i01     |

Table S3: Sequence Accession Numbers of 75 *H. vulgaris* (*Hv*) and *H. oligactis* (*Ho\_CS*, *Ho\_CR*) orthologs to the mammalian autophagy genes.

For the comparative analysis of the cold-induced gene modulations in *Ho\_CR* and *Ho\_CS*, see the **Figure S10** and **Figure S11**. For the spatial, cell-type, i-cell loss and regeneration RNA-seq profiles of corresponding transcripts in *H. vulgaris*, see on HydrATLAS: <https://HydrATLAS.unige.ch> (Wenger et al., 2019).

| Gene names      | Primer names | Primer sequences                                 |
|-----------------|--------------|--------------------------------------------------|
| <b>mCherry</b>  | mCherry-for1 | CAGGGGCCCTGGGATCCCCATGGCCGATGATGAAGTTGC          |
|                 | mCherry-rev1 | AGTTCTTCTCCTTTACTCATTTTATATAATTCATCCATTCCACCTG   |
| <b>eGFP</b>     | eGFP-for1    | TGGAATGGATGAATTATATAAAAATGAGTAAAGGAGAAGAACTTTTC  |
|                 | eGFP-rev1    | TACTTCTGAGCCATGCATGCTTTGTATAGTTCATCCATGCCA       |
| <b>hyLC3A/B</b> | LC3A-for1    | GCTGGATGAAGTATACAAAGCATGCATGGCTCAGAAGTA          |
|                 | LC3A-rev1    | CGCGCAGGCAGATCGTCAGGAATTCTTAAAAATTAATGTAAGAACCAA |

Table S4: Sequences of the primers used to build the mCherry-GFP-LC3A autophagy sensor

| Gene names                               | siRNA names    | siRNA sequences      |
|------------------------------------------|----------------|----------------------|
| <b>p62/SQSTM1</b><br><i>H. oligactis</i> | Ho-p62-siRNA1  | CAAAGCUUCUGAAGUUUCA  |
|                                          | Ho-p62-siRNA2  | CUCAAAUGGCUGCUAAUUA  |
|                                          | Ho-p62-siRNA3  | AGAACAUGUUGGAGUUACU  |
| <b>p62/SQSTM1</b><br><i>H. vulgaris</i>  | Hv-p62-siRNA1  | CAACGUUUCUGAAGUUUAUA |
|                                          | Hv-p62-siRNA2  | UGCAAAGCAAUAAUGAAGAA |
|                                          | Hv-p62-siRNA3  | AGCCAGCUCAAUCAAAUUA  |
| <b>WIPI2</b><br><i>H. vulgaris</i>       | WIPI2_siRNA1   | GCAAUUGGAGCCGAUCCUU  |
|                                          | WIPI2_siRNA2   | GCAACUUAUAGCUAUCCUAA |
|                                          | WIPI2_siRNA3   | GGAAGAACCAAGUAGCCAA  |
| <b>scrambled</b>                         | scramble-siRNA | AGGUAGUGUAAUCGCCUUG  |

Table S5: Sequences of the siRNA primers used to silence *p62/SQSTM1* and *WIPI2*

| Targeted protein                              | Type       | Raised in | Supplier           | Ref. number     | Dilution /IF | Dilution/ WB |
|-----------------------------------------------|------------|-----------|--------------------|-----------------|--------------|--------------|
| <b>Ubiquitin</b>                              | monoclonal | mouse     | Enzo Life Sciences | BML-PW0755-0025 | 1:200        | NA           |
| <b>Ubiquitin</b>                              | monoclonal | rabbit    | Abcam              | ab137025        | NA           | 1:2000       |
| <b>Human LC3B</b>                             | polyclonal | rabbit    | Novus Biologicals  | nb100-2220      | 1:300        | 1:1000       |
| <b>Hydra p62/SQSTM1</b>                       | polyclonal | mouse     | Delphi Genetics    | custom made     | 1:200        | 1:1000       |
| <b>Sea urchin <math>\alpha</math>-tubulin</b> | monoclonal | mouse     | Sigma-Aldrich      | T5168           | 1:300        | NA           |
| <b>Sea urchin <math>\beta</math>-tubulin</b>  | monoclonal | mouse     | Sigma-Aldrich      | T5293           | NA           | 1:2000       |

Table S6: List of the antibodies used in this study.

| Day post-HU | Ho_CS |    |    |    |    |    | Ho_CR |    |    |    |    |    | Hv |    |    |    |    |    |
|-------------|-------|----|----|----|----|----|-------|----|----|----|----|----|----|----|----|----|----|----|
|             | C1    | C2 | C3 | C4 | C5 | C6 | C1    | C2 | C3 | C4 | C5 | C6 | C1 | C2 | C3 | C4 | C5 | C6 |
| 0           | 10    | 10 | 10 | 10 | 10 | 10 | 10    | 10 | 10 | 10 | 10 | 10 | 10 | 10 | 10 | 10 | 10 | 10 |
| 3           | 10    | 10 | 10 | 9  | 10 | 10 | 10    | 10 | 10 | 10 | 10 | 10 | 10 | 10 | 10 | 10 | 10 | 10 |
| 7           | 10    | 10 | 10 | 9  | 10 | 10 | 10    | 10 | 9  | 10 | 10 | 10 | 10 | 10 | 10 | 10 | 10 | 10 |
| 11          | 10    | 9  | 7  | 9  | 10 | 10 | 10    | 10 | 9  | 10 | 10 | 10 | 10 | 10 | 10 | 10 | 10 | 10 |
| 15          | 10    | 9  | 7  | 9  | 10 | 10 | 10    | 10 | 9  | 10 | 10 | 10 | 10 | 10 | 10 | 10 | 10 | 10 |
| 21          | 10    | 9  | 7  | 9  | 10 | 10 | 10    | 10 | 9  | 10 | 10 | 10 | 10 | 10 | 10 | 10 | 10 | 10 |
| 26          | 8     | 9  | 5  | 9  | 9  | 9  | 9     | 9  | 10 | 8  | 9  | 10 | 10 | 10 | 10 | 10 | 10 | 10 |
| 30          | 8     | 9  | 4  | 7  | 9  | 7  | 6     | 9  | 8  | 8  | 7  | 8  | 10 | 10 | 10 | 10 | 10 | 10 |
| 34          | 5     | 4  | 2  | 2  | 5  | 3  | 1     | 3  | 3  | 4  | 2  | 2  | 10 | 10 | 10 | 10 | 10 | 10 |
| 38          | 2     | 1  | 1  | 1  | 4  | 2  | 0     | 2  | 1  | 1  | 0  | 2  | 10 | 10 | 10 | 10 | 10 | 10 |
| 42          | 1     | 0  | 1  | 0  | 1  | 2  | 0     | 0  | 0  | 0  | 0  | 0  | 10 | 10 | 10 | 10 | 10 | 9  |
| 46          | 0     | 0  | 0  | 0  | 0  | 0  |       |    |    |    |    |    | 9  | 9  | 9  | 10 | 10 | 9  |
| 49          |       |    |    |    |    |    |       |    |    |    |    |    | 9  | 9  | 9  | 10 | 8  | 9  |
| 52          |       |    |    |    |    |    |       |    |    |    |    |    | 9  | 9  | 8  | 10 | 8  | 9  |
| 58          |       |    |    |    |    |    |       |    |    |    |    |    | 8  | 7  | 7  | 10 | 8  | 6  |
| 63          |       |    |    |    |    |    |       |    |    |    |    |    | 6  | 6  | 6  | 8  | 7  | 4  |
| 65          |       |    |    |    |    |    |       |    |    |    |    |    | 5  | 5  | 5  | 8  | 6  | 4  |
| 70          |       |    |    |    |    |    |       |    |    |    |    |    | 3  | 4  | 4  | 8  | 5  | 4  |
| 74          |       |    |    |    |    |    |       |    |    |    |    |    | 3  | 4  | 4  | 6  | 5  | 4  |
| 77          |       |    |    |    |    |    |       |    |    |    |    |    | 3  | 4  | 4  | 6  | 4  | 4  |
| 81          |       |    |    |    |    |    |       |    |    |    |    |    | 3  | 4  | 4  | 6  | 3  | 4  |
| 85          |       |    |    |    |    |    |       |    |    |    |    |    | 2  | 2  | 0  | 4  | 3  | 3  |
| 88          |       |    |    |    |    |    |       |    |    |    |    |    | 1  | 1  | 0  | 4  | 3  | 2  |
| 93          |       |    |    |    |    |    |       |    |    |    |    |    | 1  | 1  | 0  | 2  | 3  | 1  |
| 100         |       |    |    |    |    |    |       |    |    |    |    |    | 0  | 0  | 0  | 0  | 0  | 0  |

Table-S7: Number of animals at different days after HU release (Figure 2I raw data). C: cohort.

| Day at 10°C | Ho_CS   |         |         |         |         |         | Ho_CS +0.8 μM Rapamycin |         |         |         |         |         |
|-------------|---------|---------|---------|---------|---------|---------|-------------------------|---------|---------|---------|---------|---------|
|             | Cohort1 | Cohort2 | Cohort3 | Cohort4 | Cohort5 | Cohort6 | Cohort1                 | Cohort2 | Cohort3 | Cohort4 | Cohort5 | Cohort6 |
| 0           | 10      | 10      | 10      | 10      | 10      | 10      | 10                      | 10      | 10      | 10      | 10      | 10      |
| 10          | 10      | 10      | 10      | 10      | 10      | 10      | 10                      | 10      | 10      | 10      | 10      | 10      |
| 14          | 10      | 10      | 10      | 10      | 10      | 10      | 10                      | 10      | 10      | 10      | 10      | 10      |
| 18          | 10      | 10      | 10      | 10      | 10      | 10      | 10                      | 10      | 9       | 10      | 10      | 10      |
| 22          | 10      | 10      | 10      | 10      | 10      | 10      | 10                      | 10      | 9       | 10      | 10      | 10      |
| 28          | 10      | 10      | 10      | 10      | 10      | 10      | 10                      | 10      | 9       | 10      | 10      | 10      |
| 33          | 9       | 9       | 9       | 10      | 8       | 9       | 10                      | 10      | 9       | 10      | 10      | 10      |
| 37          | 6       | 9       | 9       | 8       | 7       | 9       | 10                      | 10      | 9       | 10      | 10      | 10      |
| 41          | 2       | 8       | 6       | 6       | 5       | 7       | 10                      | 10      | 9       | 10      | 10      | 9       |
| 45          | 1       | 7       | 5       | 5       | 5       | 6       | 10                      | 10      | 9       | 10      | 10      | 9       |
| 49          | 1       | 4       | 5       | 3       | 5       | 6       | 10                      | 8       | 9       | 9       | 10      | 7       |
| 53          | 1       | 4       | 2       | 2       | 5       | 3       | 8                       | 7       | 8       | 8       | 10      | 7       |
| 56          | 1       | 4       | 1       | 1       | 2       | 3       | 7                       | 6       | 8       | 7       | 10      | 6       |
| 59          | 0       | 4       | 0       | 1       | 1       | 2       | 7                       | 4       | 8       | 7       | 10      | 4       |
| 65          | 0       | 2       | 0       | 1       | 1       | 1       | 7                       | 1       | 7       | 5       | 7       | 3       |
| 70          | 0       | 2       | 0       | 1       | 0       | 1       | 4                       | 0       | 6       | 5       | 4       | 2       |
| 72          | 0       | 2       | 0       | 1       | 0       | 1       | 4                       | 0       | 6       | 5       | 4       | 2       |
| 77          | 0       | 2       | 0       | 0       | 0       | 1       | 4                       | 0       | 6       | 5       | 2       | 1       |
| 81          | 0       | 2       | 0       | 0       | 0       | 1       | 4                       | 0       | 6       | 3       | 2       | 1       |
| 84          | 0       | 2       | 0       | 0       | 0       | 1       | 4                       | 0       | 6       | 3       | 1       | 1       |
| 89          | 0       | 1       | 0       | 0       | 0       | 1       | 3                       | 0       | 6       | 3       | 1       | 1       |
| 93          | 0       | 0       | 0       | 0       | 0       | 0       | 2                       | 0       | 5       | 2       | 1       | 1       |
| 95          |         |         |         |         |         |         | 1                       | 0       | 4       | 2       | 1       | 1       |
| 100         |         |         |         |         |         |         | 1                       | 0       | 3       | 1       | 1       | 0       |
| 107         |         |         |         |         |         |         | 1                       | 0       | 3       | 1       | 0       | 0       |
| 113         |         |         |         |         |         |         | 1                       | 0       | 2       | 0       | 0       | 0       |

Table-S8: Number of animals at different days after transfer to 10°C release, continuously exposed or not to rapamycin (0.8 μM) (Figure 6B raw data).

## SUPPLEMENTARY MOVIES

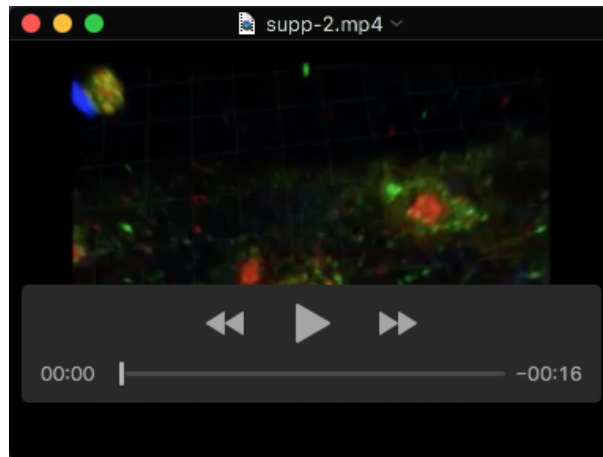

Movie 1: 3D-reconstruction of LC3 decorated p62/SQSTM1 bodies

LC3 decorated p62/SQSTM1 bodies identified in epithelial cells of *Ho\_CS* polyps macerated after 35 days at 10°C. Image acquired on a Leica SP8 confocal microscope, 3D reconstruction performed with Bitplane Imaris.

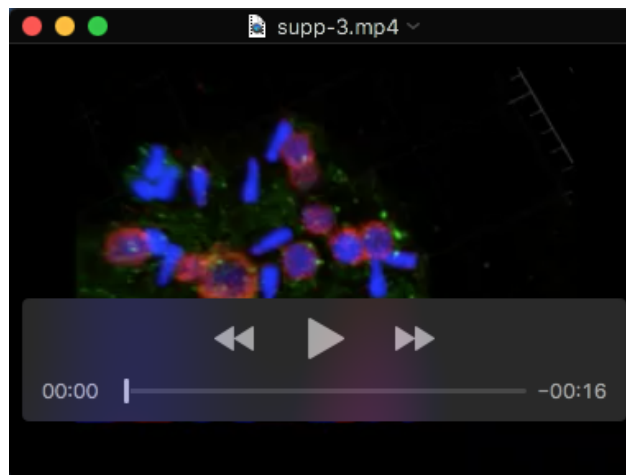

Movie 2: 3D-reconstruction of an epithelial cell having engulfed germ cells identified in 35 days old *Ho\_CS* polyps treated with Rapamycin

3D reconstruction with Bitplane Imaris of the confocal image of engulfed germ cells decorated with p62/SQSTM1 or p62/SQSTM1-LC3 in e-cells of *Ho\_CS* polyp maintained at 10°C for 35 days and continuously treated with Rapamycin.



## SUPPLEMENTARY REFERENCES

- Birgisdottir, A. B., Lamark, T. and Johansen, T.** (2013). The LIR motif - crucial for selective autophagy. *J Cell Sci*, **126**, 3237-47.
- Bitto, A., Lerner, C. A., Nacarelli, T., Crowe, E., Torres, C. and Sell, C.** (2014). P62/SQSTM1 at the interface of aging, autophagy, and disease. *Age (Dordr)*, **36**, 9626.
- Pankiv, S., Clausen, T. H., Lamark, T., Brech, A., Bruun, J. A., Outzen, H., Overvatn, A., Bjorkoy, G. and Johansen, T.** (2007). p62/SQSTM1 binds directly to Atg8/LC3 to facilitate degradation of ubiquitinated protein aggregates by autophagy. *J Biol Chem*, **282**, 24131-45.
- Seibenhener, M. L., Babu, J. R., Geetha, T., Wong, H. C., Krishna, N. R., Wooten, M. W.** (2004). Sequestosome1/p62 is a polyubiquitin chain binding protein involved in ubiquitin proteasome degradation. *Mol Cell Biol*, **24**, 8055-8068. doi: 10.1128/MCB.24.18.8055-8068.2004
- Wenger, Y., Buzgariu, W. and Galliot, B.** (2016). Loss of neurogenesis in Hydra leads to compensatory regulation of neurogenic and neurotransmission genes in epithelial cells. *Philos Trans R Soc Lond B Biol Sci*, **371**, 20150040.
- Wenger, Y., Buzgariu, W., Reiter, S. and Galliot, B.** (2014). Injury-induced immune responses in Hydra. *Semin Immunol*, **26**, 277-294.
- Wenger, Y., Buzgariu, W., Perruchoud, C., Loichot, G., Galliot, B.** (2019). Generic and context-dependent gene modulations during Hydra whole body regeneration. *BioRxiv* 587147, doi.org: 10.1101/587147
